# Supplementary material for: Unveiling the scope and perspectives of MOF-derived materials for cutting-edge applications
Source: Royal Society of Chemistry journal article supplement (doi:10.1039/d4nr02168a), 2024-01-01
Supplement: d4nr02168a1.pdf [file d4nr02168a1.pdf]

## Supporting Information

### **Unveiling the scope and perspectives of MOF-derived materials for the cutting-edge applications†**

*Khezina Rafiq<sup>a\*</sup>, Mamoona Sabir<sup>a</sup>, Muhammad Zeeshan Abid<sup>a</sup>, Ejaz Hussain<sup>a\*</sup>*

<sup>a</sup>Institute of Chemistry, Inorganic Materials Laboratory 52S, The Islamia University of Bahawalpur–63100, Pakistan

Corresponding author email: [ejaz.hussain@iub.edu.pk](mailto:ejaz.hussain@iub.edu.pk); [khezina.rafiq@iub.edu.pk](mailto:khezina.rafiq@iub.edu.pk)

**Table S1.** Synthesis and applications of MOF-derived nano-architectures developed by solution-based etching strategies.

| Targeted Materials                                           | Sacrificial Template                                               | Etching Reagent                                                                                               | Surface area (m <sup>2</sup> g <sup>-1</sup> ) | Pore volume (cm <sup>3</sup> g <sup>-1</sup> ) | Applications                                     | Ref. |
|--------------------------------------------------------------|--------------------------------------------------------------------|---------------------------------------------------------------------------------------------------------------|------------------------------------------------|------------------------------------------------|--------------------------------------------------|------|
| Cu/MgAl <sub>2</sub> O <sub>4</sub>                          | Al-MOF                                                             | NaOH                                                                                                          | 212.4                                          | 0.6                                            | Catalytic steam reforming                        | 1    |
| Ni <sup>0</sup> -Al <sub>2</sub> O <sub>3</sub> -PET         | Al-MOF                                                             | Ni(NO <sub>3</sub> ) <sub>2</sub> ·6H <sub>2</sub> O aq. solution                                             | 356                                            | 1.12                                           | Catalytic dry reforming                          | 2    |
| Fe <sub>2</sub> Co <sub>1</sub> /NPC                         | Co/Fe-MOFs                                                         | 5M HNO <sub>3</sub>                                                                                           | 211.6                                          | 0.558                                          | Electro-Fenton catalysis                         | 3    |
| Co <sub>3</sub> O <sub>4</sub> -C@FeOOH                      | ZIF-67                                                             | 7mM FeSO <sub>4</sub>                                                                                         | 100.23                                         | n.a                                            | Catalytic ozonation                              | 4    |
| Co <sub>3</sub> O <sub>4</sub>                               | ZIF-L-Co/NF                                                        | Co(NO <sub>3</sub> ) <sub>2</sub> ·6H <sub>2</sub> O ethanol solution                                         | 103.9                                          | 0.52                                           | Electrocatalytic oxidation                       | 5    |
| MnO@C/GF                                                     | Mn-MOF                                                             | Trimesic acid                                                                                                 | 14.005                                         | 0.0398                                         | Electrocatalytic oxidation                       | 6    |
| eFeNSCs                                                      | FeCo-ZIF-8                                                         | Methanol                                                                                                      | 695.9                                          | n.a                                            | Electrocatalytic degradation                     | 7    |
| X-Cu-BDC (X=NH <sub>2</sub> , OH, H, F & 2F)                 | Cu-MOF                                                             | 0.2M NaOH                                                                                                     | n.a                                            | n.a                                            | Electrocatalytic reduction                       | 8    |
| Ni-Fe-C-600-acid/GO                                          | 2D Ni-Fe-MOF                                                       | 0.5M H <sub>2</sub> SO <sub>4</sub>                                                                           | 842.21                                         | n.a                                            | Catalytic oxidation                              | 9    |
| Co/CN-x                                                      | Zn/Co-ZIF-8                                                        | Aqua regia                                                                                                    | 818                                            | 0.975                                          | Catalytic oxidation                              | 10   |
| Co/N-doped carbon                                            | ZIF-67                                                             | Polydopamine                                                                                                  | 403                                            | 0.30                                           | Catalytic oxidation                              | 11   |
| CeO <sub>2</sub> .Co <sub>3</sub> O <sub>4</sub> nanoflowers | Ce-TCPP                                                            | Ce(NO <sub>3</sub> ) <sub>3</sub> ·6H <sub>2</sub> O and Co(NO <sub>3</sub> ) <sub>2</sub> ·6H <sub>2</sub> O | 104.86                                         | n.a                                            | Catalytic oxidation                              | 12   |
| Mn-MP                                                        | Mn <sub>3</sub> (BTC) <sub>2</sub> (H <sub>2</sub> O) <sub>6</sub> | Trimesic acid                                                                                                 | 51                                             | 0.5                                            | Catalytic reduction                              | 13   |
| C@Fe-800                                                     | Fe-BDC                                                             | FeCl <sub>3</sub> ·6H <sub>2</sub> O                                                                          | n.a                                            | n.a                                            | Catalytic reduction                              | 14   |
| fBN@NiCo-LDH                                                 | NiCo-LDH                                                           | 150mL ethanol                                                                                                 | n.a                                            | n.a                                            | Interface-charring catalysis                     | 15   |
| GMN@Co <sub>x</sub> S <sub>y</sub>                           | ZIF-67                                                             | Thioacetamide                                                                                                 | 78.5                                           | 0.41                                           | Electrocatalytic water splitting                 | 16   |
| Au/Co <sub>x</sub> S <sub>y</sub>                            | ZIF-67                                                             | Thioacetamide                                                                                                 | 79.38                                          | 3.98                                           | Electrocatalytic water splitting                 | 17   |
| NiCoP/CoP/Co <sub>3</sub> O <sub>4</sub>                     | CC@Co-MOF                                                          | Ni(NO <sub>3</sub> ) <sub>2</sub> in ethanol                                                                  | 16.09                                          | n.a                                            | Electrocatalytic water splitting                 | 18   |
| MoNiS/Mo <sub>2</sub> TiC <sub>2</sub> T <sub>x</sub>        | Ni-MOF                                                             | 50 wt% HF                                                                                                     | n.a                                            | n.a                                            | Electrocatalytic Water splitting                 | 19   |
| H-2D Co/Mo <sub>2</sub> C@NC                                 | Co-MOF & Zn-MOF                                                    | Ammonium molybdate tetrahydrate                                                                               | n.a                                            | n.a                                            | Electrocatalytic water splitting                 | 20   |
| CuFeN/CNT                                                    | Cu-MOF                                                             | Water and ethanol mixture                                                                                     | n.a                                            | n.a                                            | Electrocatalytic water splitting                 | 21   |
| CoP-NC@NFP                                                   | Co-MOF                                                             | Ni(NO <sub>3</sub> ) <sub>2</sub> ·6H <sub>2</sub> O & FeSO <sub>4</sub> ·7H <sub>2</sub> O                   | 247                                            | n.a                                            | Electrocatalytic water splitting                 | 22   |
| Ru-NPs/SAs@N-T C                                             | NH <sub>2</sub> -MIL-125                                           | Methanol                                                                                                      | 307.5                                          | 0.19                                           | Electrocatalytic/ photocatalytic water splitting | 23   |

|                                                                                    |                  |                                                                                                                               |              |        |                                  |    |
|------------------------------------------------------------------------------------|------------------|-------------------------------------------------------------------------------------------------------------------------------|--------------|--------|----------------------------------|----|
| Tb <sup>3+</sup> @Zr-MOF                                                           | Zr-MOF           | HCl                                                                                                                           | 483          | n.a    | Fluorescence sensing             | 24 |
| [Tb <sub>0.43</sub> Eu <sub>1.57</sub> (1,4-phda) <sub>3</sub> (H <sub>2</sub> O)] | Ln-MOF           | Eu(NO <sub>3</sub> ) <sub>3</sub> ·5H <sub>2</sub> O, Tb(NO <sub>3</sub> ) <sub>3</sub> ·5H <sub>2</sub> O and sodium acetate | n.a          | n.a    | Ratiometric fluorescence sensing | 25 |
| Co <sub>3</sub> O <sub>4</sub> @C/GNP                                              | Co-MOF           | Metol, Hydroquinone & Catechol                                                                                                | n.a          | n.a    | Electrochemical sensing          | 26 |
| Co <sub>3</sub> O <sub>4</sub> /NCNTs                                              | ZIF-67           | H <sub>2</sub> O <sub>2</sub> and glucose                                                                                     | n.a          | n.a    | Electrochemical sensing          | 27 |
| Hollow ZnO nanocages                                                               | ZIF-8            | triethanolamine                                                                                                               | 59.4         | n.a    | Gas sensing                      | 28 |
| ZnFe <sub>2</sub> O <sub>4</sub> /(Fe-ZnO)                                         | Zn-MOF-5         | Fe(NO <sub>3</sub> ) <sub>3</sub> ·9H <sub>2</sub> O                                                                          | n.a          | n.a    | Gas sensing                      | 29 |
| CoWO <sub>4</sub> -modified α-Fe <sub>2</sub> O <sub>3</sub>                       | MIL-53(Fe)       | NH <sub>4</sub> F                                                                                                             | n.a          | n.a    | Gas sensing                      | 30 |
| IGO@ZnO                                                                            | MIL-68 (In/Ga)   | Zinc acetate ethanol solution                                                                                                 | 108.71       | n.a    | Gas sensing                      | 31 |
| Fe <sub>2</sub> O <sub>3</sub> /rGO                                                | MOF-PB           | FeCl <sub>3</sub> solution                                                                                                    | 34.69        | n.a    | Gas sensing                      | 32 |
| α-Fe <sub>2</sub> O <sub>3</sub> and γ-Fe <sub>2</sub> O <sub>3</sub>              | PBA cubes        | 0.1M HCl                                                                                                                      | 108.3        | n.a    | Gas sensing                      | 33 |
| In <sub>2</sub> O <sub>3</sub> /MoS <sub>2</sub>                                   | MIL-68(In)       | Thioacetamide                                                                                                                 | 32.37        | n.a    | Gas sensing                      | 34 |
| ZnCoNiP                                                                            | Zn/Co-MOFs       | 1 M NaOH                                                                                                                      | 20.23        | 0.06   | Supercapacitors                  | 35 |
| MX@ZCO                                                                             | ZCM              | LiF in 10 ml of 9 M HCl                                                                                                       | 40.2         | n.a    | Supercapacitors                  | 36 |
| Ni-ZnP/Zn-Co-S                                                                     | ZnCo-MOF on NF   | 0.1 M Na <sub>2</sub> S aq. solution                                                                                          | n.a          | n.a    | Supercapacitors                  | 37 |
| Ni-Fe-O/NPC@PCNFs                                                                  | Ni-Fe-MOFs@PCNFs | NH <sub>4</sub> F                                                                                                             | 52.95        | 0.21   | Supercapacitor                   | 38 |
| Co <sub>3</sub> O <sub>4</sub>                                                     | Co-MOFs          | 1M HCl                                                                                                                        | n.a          | n.a    | Supercapacitors                  | 39 |
| NiCo <sub>2</sub> S <sub>4</sub> /Co <sub>3</sub> S <sub>4</sub> NCs               | ZIF-67           | Thioacetamide                                                                                                                 | 15.61        | n.a    | Supercapacitors                  | 40 |
| Bi/Bi <sub>2</sub> O <sub>3</sub> -C                                               | Bi-MOFs          | Bi(NO <sub>3</sub> ) <sub>3</sub> ·5H <sub>2</sub> O in methanol                                                              | 163.6        | 0.251  | Batteries                        | 41 |
| HPCO                                                                               | Cu-BTC@PVP       | 2M FeCl <sub>3</sub> Solution                                                                                                 | 266          | n.a    | Batteries                        | 42 |
| Co/NC-TiO <sub>2</sub>                                                             | Co-MIL-125       | Co(NO <sub>3</sub> ) <sub>2</sub> ·6H <sub>2</sub> O solution in 50 mL ethanol                                                | 437          | 0.352  | Batteries                        | 43 |
| Si NDs@MDN                                                                         | ZIF-8            | Methanol                                                                                                                      | 52.8         | 0.1328 | Batteries                        | 44 |
| 2D MXene@Co <sub>9</sub> S <sub>8</sub> /CoMo <sub>2</sub> S <sub>4</sub>          | MXene@ZIF-67     | 12M HCl soln.                                                                                                                 | n.a          | n.a    | Batteries                        | 45 |
| Ni(OH) <sub>2</sub> @NC/CTs & Fe <sub>2</sub> O <sub>3</sub> @NC/CTs               | Co-MOF           | 15μL HCl                                                                                                                      | 210.4<br>228 | n.a    | Batteries                        | 46 |
| C@VO <sub>2</sub> @V <sub>2</sub> O <sub>5</sub>                                   | V-MIL-88         | 2mL HCl                                                                                                                       | 126.5        | n.a    | Batteries                        | 47 |
| CoFe@NC/KB-800                                                                     | Co-MOF           | melamine                                                                                                                      | 1318.8       | n.a    | Batteries                        | 48 |
| Co <sub>9</sub> S <sub>8</sub> @MoS <sub>2</sub> nanocubes on RGO                  | GO@ZIF-67        | aq. Na <sub>2</sub> MoO <sub>4</sub>                                                                                          | n.a          | n.a    | Radiation absorption             | 49 |
| Ni@CoZn/C and Fe@CoZn/C                                                            | BMZIF            | 30mL absolute ethanol                                                                                                         | n.a          | n.a    | Radiation absorption             | 50 |
| nCoI-NPs@NC                                                                        | Co-MOF           | 8M HNO <sub>3</sub>                                                                                                           | 431          | 0.6    | Selective bond                   | 51 |

|  |  |  |  |  |          |  |
|--|--|--|--|--|----------|--|
|  |  |  |  |  | breaking |  |
|--|--|--|--|--|----------|--|

Where n.a = not available.

**Table S2.** MOF-derived and MOF-supported nanostructures for electrode materials in energy storage batteries.

| Battery       | Derived Material                                                               | MOF Template                       | Specific capacity [mAh g <sup>-1</sup> ] | Charge density [mA g <sup>-1</sup> ] | Capacity retention [%] | Cycle life [cycles] | Ref. |
|---------------|--------------------------------------------------------------------------------|------------------------------------|------------------------------------------|--------------------------------------|------------------------|---------------------|------|
| LIB           | Si NDs@MDN                                                                     | ZIF-8                              | 1327                                     | 100                                  | 92.99                  | 300                 | 44   |
| LIB           | CoP@N/P-(C/CNTs)                                                               | ZIF-67                             | 1215                                     | 500                                  | 57.3                   | 200                 | 52   |
| LIB           | LCO@ACF                                                                        | Li@ZIF67@ACF                       | 154.1                                    | 340                                  | 79.2                   | 550                 | 53   |
| LIB           | LCO@C                                                                          | ZIF-67                             | 171.1                                    | 170                                  | 65                     | 200                 | 54   |
| LIB           | Co <sub>3</sub> P@NC                                                           | ZIF-67                             | 928                                      | 100                                  | 81.2                   | 100                 | 55   |
| LIB           | CoF <sub>2</sub> /Fe <sub>2</sub> O <sub>3</sub>                               | ZIF-67                             | 130.4                                    | 100                                  | 92.6                   | 400                 | 56   |
| LIB           | CoS <sub>2</sub> /C/C                                                          | Co(IPC).H <sub>2</sub> O           | 1076                                     | 100                                  | 77                     | 100                 | 57   |
| LIB           | PCNF-Co/N                                                                      | Co/Zn-MOF                          | 108.7                                    | 170                                  | 89                     | 500                 | 58   |
| LIB           | CC@CN-Co                                                                       | CC@Co-MOF                          | 158                                      | 170                                  | 98.7                   | 300                 | 59   |
| LIB           | ES-CNC/Co <sub>3</sub> O <sub>4</sub> @rGO                                     | ZIF-67@GO                          | 1315                                     | 100                                  | 99                     | 500                 | 60   |
| LIB           | Si@c-ZIF                                                                       | ZIF-67                             | 3714                                     | 200                                  | 99.4                   | 1000                | 61   |
| LIB           | CoFe <sub>2</sub> O <sub>4</sub> @CNF                                          | MIL-101                            | 1230                                     | 100                                  | 74.9                   | 500                 | 62   |
| LIB           | CoO/Co <sub>2</sub> Mo <sub>3</sub> O <sub>8</sub> @MXene                      | ZIF-67                             | 947.4                                    | 100                                  | 98.5                   | 1200                | 63   |
| LSB           | Co/NC-TiO <sub>2</sub>                                                         | Co-MIL-125                         | 941                                      | n.a                                  | 68.8                   | 500                 | 43   |
| LSB           | MoS <sub>2</sub> @CZIF67                                                       | ZIF-67                             | 1391                                     | 1000                                 | 70.5                   | 400                 | 64   |
| LSB           | Co-SAs@NC                                                                      | Co-Zn-MOF                          | 737                                      | 170                                  | n.a                    | 600                 | 65   |
| LSB           | Co <sub>3-x</sub> Mn <sub>x</sub> O <sub>4</sub> /C                            | Mn-ZIF-67                          | 1082                                     | 170                                  | 60.4                   | 500                 | 66   |
| LSB           | FeSA-CN/S                                                                      | Fe-ZIF-8                           | 605                                      | 680                                  | 70                     | 500                 | 67   |
| LSB           | HPCNs                                                                          | ZIF-8                              | 335                                      | 34                                   | 89                     | 100                 | 68   |
| LSB           | CoZn-Se@N-MX                                                                   | CoZn-MOFs                          | 362.5                                    | 510                                  | 99.5                   | 2000                | 69   |
| LAB           | MnO/CoMn <sub>2</sub> O <sub>4</sub> @N-C                                      | $\alpha$ -MnO <sub>2</sub> @ZIF-67 | 8625                                     | 200                                  | 78.3                   | 48                  | 70   |
| LAB           | Co <sub>3</sub> O <sub>4</sub> @NiCo <sub>2</sub> O <sub>4</sub> /CC           | Co-MOF                             | 10645                                    | 100                                  | n.a                    | 225                 | 71   |
| Mg-Li battery | Cu <sub>2</sub> S@C                                                            | Cu-MOF                             | 399.2                                    | 8.6                                  | 46.4                   | 50                  | 72   |
| NIB           | 2D MXene@Co <sub>9</sub> S <sub>8</sub> /CoMo <sub>2</sub> S <sub>4</sub>      | MXene@ZIF-67                       | 196                                      | 5000                                 | 83.2                   | 350                 | 45   |
| NIB           | Co-C                                                                           | Co-Bpdc                            | 172                                      | 100                                  | 58                     | 60                  | 73   |
| NIB           | CoS <sub>2</sub> /C/C                                                          | Co(IPC).H <sub>2</sub> O           | 712                                      | 100                                  | 92.1                   | 100                 | 57   |
| NIB           | NiCoSe <sub>4</sub>                                                            | NiCo-MOF                           | 325                                      | 1000                                 | 87.3                   | 1500                | 74   |
| NIB           | rGO@MCSe                                                                       | Mo/Co-MOF                          | 123.6                                    | 100                                  | 88.4                   | 700                 | 75   |
| NIB           | ZnSe@PCNF                                                                      | PAN@ZIF-8                          | 197.3                                    | 340                                  | 76.95                  | 1700                | 76   |
| Ni-Fe battery | Ni(OH) <sub>2</sub> @NC/CTs & $\alpha$ -Fe <sub>2</sub> O <sub>3</sub> @NC/CTs | Co-MOF                             | 94.8                                     | 50                                   | 86.1                   | 10,000              | 46   |
| KIB           | Bi/Bi <sub>2</sub> O <sub>3</sub> -C                                           | Bi MOFs                            | 426                                      | 50                                   | 76.6                   | 350                 | 41   |
| KIB           | rGO@MCSe                                                                       | Mo/Co-MOF                          | 114.8                                    | 100                                  | 99.9                   | 125                 | 75   |
| KIB           | ZnSe@PCNF                                                                      | ZIF-8                              | 139                                      | 170                                  | 98                     | 1000                | 77   |
| AIB           | CoTe <sub>2</sub> @N-PC                                                        | ZIF-67                             | 635.8                                    | 200                                  | 90                     | 200                 | 78   |
| AIB           | HPCO                                                                           | Cu-BTC@PVP                         | 60.8                                     | 100                                  | 98                     | 200                 | 42   |
| ZIB           | C@VO <sub>2</sub> @V <sub>2</sub> O <sub>5</sub>                               | V-MIL-88                           | 376                                      | 50                                   | 90.3                   | 2000                | 79   |
| ZIB           | Zn/Co doped MnO/C                                                              | ZnCoMn-BTC                         | 428.9                                    | 100                                  | 98.7                   | 3000                | 80   |
| ZIB           | Mn <sub>2</sub> O <sub>3</sub>                                                 | Mn-MOF                             | 453                                      | 100                                  | 99                     | 500                 | 81   |
| ZIB           | CoO/Ni <sub>2</sub> P-Co <sub>2</sub> P                                        | Co-MOF                             | 322.8                                    | 2000                                 | 104.9                  | 6000                | 82   |
| ZIB           | MnO-C                                                                          | Mn-MOF                             | 727.7                                    | 100                                  | ~10                    | 50                  | 83   |
| ZIB           | MnO/C@rGO                                                                      | Mn-MOF                             | 170.6                                    | 500                                  | 43.1                   | 300                 | 84   |
| ZIB           | ZnO/N/C                                                                        | ZIF-8                              | 172.2                                    | 300                                  | 97                     | 8000                | 85   |
| ZIB           | ZnMn <sub>2</sub> O <sub>4</sub> /Mn <sub>2</sub> O <sub>3</sub>               | ZIF-8/MnO <sub>2</sub>             | 230                                      | 100                                  | n.a                    | n.a                 | 86   |
| ZIB           | $\alpha$ -Mn <sub>2</sub> O <sub>3</sub>                                       | Mn-MOF                             | 225                                      | 50                                   | 53.3                   | 1700                | 87   |
| ZIB           | Cu <sub>0.26</sub> V <sub>2</sub> O <sub>5</sub> @C                            | Cu-MOF                             | 163.8                                    | 2000                                 | 93.5                   | 500                 | 88   |
| ZIB           | N-doped 1T MoS <sub>2</sub>                                                    | Mo-MOF                             | 149.6                                    | 100                                  | 97.1                   | 600                 | 89   |

|     |                                                                                        |            |        |      |       |        |     |
|-----|----------------------------------------------------------------------------------------|------------|--------|------|-------|--------|-----|
| ZIB | Zn@3D-ZGC//MnO <sub>2</sub>                                                            | Zn-MOF     | 238.3  | 200  | 99.4  | 1500   | 90  |
| ZIB | $\alpha$ -V <sub>2</sub> O <sub>5</sub> @C                                             | MIL-88B(V) | 620.2  | 300  | 91.4  | 20000  | 91  |
| ZIB | Mn <sub>2</sub> O <sub>3</sub> -ZnMn <sub>2</sub> O <sub>4</sub>                       | Mn-MIL     | 247.4  | 100  | 93.3  | 2000   | 92  |
| ZIB | MnO <sub>x</sub> @N-C                                                                  | ZIF-8      | 305    | 2000 | 85.2  | 1600   | 93  |
| ZIB | Mn <sub>3</sub> O <sub>4</sub> @C-NA/CC                                                | Mn-MOF     | 396.2  | 200  | 95.7  | 12000  | 94  |
| ZAB | CoFe@NC/KB-800                                                                         | Co-MOF     | 654    | n.a  | 90.1  | 50,000 | 48  |
| ZAB | FeCo-N-C-T                                                                             | ZnCo-ZIF   | 518    | 10   | 80.1  | 360    | 95  |
| ZAB | Co-NCS@CNT                                                                             | ZIF-L      | 798    | n.a  | n.a   | 480    | 96  |
| ZAB | Co <sub>3</sub> O <sub>4</sub> /Mn <sub>3</sub> O <sub>4</sub> /CN <sub>x</sub> @C NFs | Co, Mn-ZIF | n.a    | n.a  | 82.5  | 175000 | 97  |
| ZAB | CoP/NC                                                                                 | ZIF-67     | 695.08 | n.a  | 95    | 10,000 | 98  |
| ZAB | FeCoNC                                                                                 | Co/Fe-MOF  | n.a    | n.a  | 95.45 | 690    | 99  |
| ZAB | ZOMC                                                                                   | ZIF-67     | 795.3  | n.a  | 95    | 500    | 100 |
| ZAB | FeS/Fe <sub>3</sub> C@NS-C-900                                                         | Fe-MOF     | 750    | 2    | 53.7  | 1730   | 101 |
| ZAB | ZIF-8                                                                                  | NHCP       | 740    | 100  | n.a   | 10000  | 102 |
| ZAB | Ni@N-HCGHF                                                                             | Ni-BTC     | 706    | 100  | 97.2  | 2000   | 103 |

Where n.a = not available.

**Table S3.** MOF-derived and MOF-supported materials for supercapacitor applications.

| Derived Material                                                                | MOF Template           | Specific Capacitance [F g <sup>-1</sup> ] | Energy Density [Wh kg <sup>-1</sup> ] | Power Density [W kg <sup>-1</sup> ] | Capacitance retention [%] | Life Cycle [cycles] | Ref. |
|---------------------------------------------------------------------------------|------------------------|-------------------------------------------|---------------------------------------|-------------------------------------|---------------------------|---------------------|------|
| Cobalt oxide/C                                                                  | Co-MOF                 | 1372                                      | 51.5                                  | 1687                                | 75                        | 2000                | 104  |
| Co <sub>3</sub> O <sub>4</sub> -C/Ni <sub>2</sub> P <sub>2</sub> O <sub>7</sub> | ZIF-67                 | 2537.78                                   | n.a                                   | n.a                                 | 88.5                      | 3000                | 105  |
| Ni-CoP@C@CNTs                                                                   | ZIF-67                 | 708.1                                     | 17.4                                  | 699.1                               | 76.1                      | 3000                | 106  |
| LaFeO <sub>3</sub>                                                              | MOG-La-Fe              | 241.3                                     | 34                                    | 900                                 | 92.2                      | 5000                | 107  |
| ZnO/C@(Ni,Co)Se <sub>2</sub>                                                    | ZIF-8                  | 945.67                                    | 65.67                                 | 800                                 | 97.87                     | 10000               | 108  |
| SAPC                                                                            | Mg-BTC                 | 362.5                                     | 15.6                                  | 372.2                               | 94.2                      | 150000              | 109  |
| Ni-Fe-P-C@HCNFs                                                                 | (Ni-Fe)-MOFs           | 1392                                      | 62.7                                  | 8238.2                              | 89                        | 10000               | 110  |
| P-Co <sub>3</sub> O <sub>4</sub> @PNC                                           | Co-MOF                 | 198                                       | 69.6                                  | 750                                 | 96.8                      | 10000               | 111  |
| Cu(Co-Ni) <sub>2</sub> S <sub>4</sub> NTs/Ni                                    | Co-MOF                 | 1047.74                                   | 36.46                                 | 316.6                               | 96.2                      | 5000                | 112  |
| CoP-CoNC/CC                                                                     | Co-MOF                 | 144                                       | 39.2                                  | 1960                                | 86.5                      | 5000                | 113  |
| Co <sub>3</sub> O <sub>4</sub> @Co-MOF                                          | Co-MOF                 | 1020                                      | 21.6                                  | 1373.3                              | 96.7                      | 5000                | 114  |
| Co <sub>3</sub> O <sub>4</sub> /N-CNTs@CNF                                      | ZIF-67                 | 238                                       | 52.9                                  | 873.5                               | 90.1                      | 10000               | 115  |
| NiO/C@CNF                                                                       | Ni-MOF                 | 742.2                                     | 58.43                                 | 1947                                | 88                        | 5000                | 116  |
| (CuCo)Se/NC                                                                     | CuCo-ZIF               | 206.38                                    | 16.3                                  | 155.3                               | 96                        | 5000                | 117  |
| NC/Ni-Ni <sub>3</sub> S <sub>4</sub> /CNTs                                      | Ni-MOF                 | 1489.9                                    | 39.8                                  | 749.8                               | 84.5                      | 3000                | 118  |
| IM-HPC                                                                          | Cu-MOF                 | 224                                       | n.a                                   | n.a                                 | 72                        | 10000               | 119  |
| TiO <sub>2</sub> /C                                                             | MIL-125                | 400                                       | 43.5                                  | 0.865                               | 95                        | 2000                | 120  |
| PPy/Cu <sub>9</sub> S <sub>8</sub> @C-CC                                        | HKUST-1                | 270.72                                    | n.a                                   | n.a                                 | 80.36                     | 3000                | 121  |
| NCSG                                                                            | Ni-Co-MOF              | 2506                                      | n.a                                   | n.a                                 | 51.8                      | 6000                | 122  |
| NFO                                                                             | NiFe <sub>2</sub> -MOF | 833                                       | 42                                    | 154                                 | 74                        | 3000                | 123  |
| PC                                                                              | Cu-MOF                 | 385                                       | 10.51                                 | 5.454                               | 90                        | 10000               | 124  |
| Ni/Co-MOF/rGO                                                                   | Ni/Co-MOF              | 1162                                      | n.a                                   | n.a                                 | 109                       | 5000                | 125  |
| PPNF@Co-Ni                                                                      | Co-MOF                 | 1096.2                                    | 93.6                                  | 1600                                | 85.5                      | 10000               | 126  |
| MXene-NPO                                                                       | Ni-MOF                 | 300                                       | 72.6                                  | 932                                 | 85                        | 10000               | 127  |

Where n.a = not available.

**Table S4.** Gas sensing performances of various reported MOF-derived and MOF-supported materials.

| Gas Sensing material                                                  | MOF precursor            | Target species   | Conc. [ppm] | Optimal Temp. [°C] | Response | T <sub>Res</sub> [sec] | T <sub>recov</sub> [sec] | Ref. |
|-----------------------------------------------------------------------|--------------------------|------------------|-------------|--------------------|----------|------------------------|--------------------------|------|
| Ni <sub>3</sub> BTC <sub>2</sub> /–OH–SWNTs                           | Ni-MOF                   | SO <sub>2</sub>  | 15          | 25                 | n.a      | 4.59                   | 11.04                    | 128  |
| Ni-MOF/–OH–SWNT                                                       | Ni-MOF                   | SO <sub>2</sub>  | 1           | 25                 | n.a      | 10                     | 30                       | 129  |
| CuO/In <sub>2</sub> O <sub>3</sub>                                    | CPP-3(In)                | H <sub>2</sub> S | 5           | 70                 | 229.3    | 10                     | 3600                     | 130  |
| Zn–Co–Ni MOF@CNT                                                      | TMOM                     | H <sub>2</sub> S | 100         | 325                | 166      | 126                    | 23                       | 131  |
| ZIF-8/ZnO                                                             | ZIF-8                    | H <sub>2</sub> S | 10          | 25                 | 52.1     | 420                    | n.a                      | 132  |
| UiO-66/GO                                                             | Zr-MOF                   | H <sub>2</sub> S | n.a         | 30                 | 8.7      | n.a                    | n.a                      | 133  |
| WO <sub>3</sub> @ZIF-71                                               | ZIF-71                   | H <sub>2</sub> S | 20          | 250                | 19.12    | 118                    | 431                      | 134  |
| ZnO                                                                   | ZIF-8                    | ethanol          | 100         | 325                | 139.41   | 2.8                    | 56.4                     | 28   |
| Cu <sub>3</sub> (HITP) <sub>2</sub> NFAs                              | Cu-MOF                   | ethanol          | 20          | 25                 | 3.5      | 50                     | 64                       | 135  |
| ZnFe <sub>2</sub> O <sub>4</sub> /(Fe–ZnO)                            | Zn-MOF-5                 | acetone          | 100         | 190                | 30.8     | 4.7                    | 10.3                     | 29   |
| IGO@ZnO                                                               | MIL-68(In/Ga)            | acetone          | 100         | 300                | 27.1     | 6.8                    | 6.1                      | 31   |
| α-Fe <sub>2</sub> O <sub>3</sub> /NiFe <sub>2</sub> O <sub>4</sub>    | Fe <sub>3</sub> MIL-88   | acetone          | 200         | 100                | 23       | 4                      | 350                      | 136  |
| Co <sub>3</sub> O <sub>4</sub> /Fe <sub>2</sub> O <sub>3</sub> cubes  | ZIF-67                   | acetone          | 100         | 250                | 3.27     | 42                     | 65                       | 137  |
| Ni <sub>3</sub> Co <sub>1</sub> xFe <sub>2</sub> O <sub>4</sub>       | Fe-MOF                   | acetone          | 200         | 240                | 1.67     | 9                      | 34                       | 138  |
| ZnO@ZIF-71                                                            | ZIF-71                   | acetone          | 50          | 250                | 5.7      | 71                     | 53                       | 139  |
| QCM based ZIF-90                                                      | ZIF-90                   | acetone          | 100         | 25                 | n.a      | 12                     | 17                       | 140  |
| CoWO <sub>4</sub> –α-Fe <sub>2</sub> O <sub>3</sub>                   | MIL-53(Fe)               | Ethyl acetate    | 100         | 206                | 21.04    | 7                      | 9                        | 30   |
| CeO <sub>2</sub> @ZIF-8                                               | ZIF-8                    | Propanol         | n.a         | 170                | n.a      | 0.7                    | 88                       | 141  |
| LaFeO <sub>3</sub>                                                    | Fe-CN-La                 | Propanol         | 100         | 120                | 28.1     | 9                      | 34                       | 142  |
| Fe <sub>2</sub> O <sub>3</sub> /rGO                                   | MOF-PB                   | n-butanol        | 100         | 25                 | 171      | 53                     | 42                       | 32   |
| α-Fe <sub>2</sub> O <sub>3</sub> and γ-Fe <sub>2</sub> O <sub>3</sub> | PBA cubes                | n-butanol        | 100         | 230                | 10.3     | 58                     | 59                       | 33   |
| ZnO nanocubes                                                         | ZIF-8                    | Formaldehyde     | 100         | 350                | 10       | 4                      | 4                        | 143  |
| Co <sub>3</sub> O <sub>4</sub> /ZnO                                   | Co/Zn-MOF                | Formaldehyde     | 10          | 120                | 6.17     | n.a                    | n.a                      | 144  |
| QCM based MOF-14                                                      | MOF-14                   | Benzene          | 100         | 25                 | n.a      | 10                     | n.a                      | 145  |
| Ni <sub>0.4</sub> Fe <sub>2.6</sub> O <sub>4</sub> NRs                | Fe-MIL-53 & Fe/Ni-MIL-53 | DEA              | 30          | 175                | 93.5     | 4                      | 38                       | 146  |
| rGO/α-Fe <sub>2</sub> O <sub>3</sub>                                  | Fe-MIL-88                | TEA              | 50          | 280                | 24       | 2                      | 7                        | 147  |
| In <sub>2</sub> O <sub>3</sub> microtubes                             | MIL-68                   | TEA              | 1           | 140                | 145      | 5                      | 20                       | 148  |
| Fe <sub>2</sub> O <sub>3</sub> /ZnFe <sub>2</sub> O <sub>4</sub>      | ZIF-8                    | TEA              | 100         | 300                | 2.44     | 2                      | 7                        | 149  |
| Co <sub>3</sub> O <sub>4</sub> /ZnO NHs                               | ZIF-8@ZIF-57             | TMA              | 50          | 190                | 232      | 2.1                    | 11.8                     | 150  |
| NiMoO <sub>4</sub> @NiO                                               | Ni-MOF                   | TMA              | 50          | 220                | 150      | 20                     | 16                       | 151  |

n.a = not available

**Table S5.** Summary of reported MOF-derived and MOF-supported nanostructures based catalysts for pollutants' degradation.

| Catalyst                                                                        | MOF Precursor                                                      | Catalytic reaction                      | Efficiency [%] | Catalysis method     | Ref. |
|---------------------------------------------------------------------------------|--------------------------------------------------------------------|-----------------------------------------|----------------|----------------------|------|
| Co <sub>3</sub> O <sub>4</sub>                                                  | ZIF-L-Co/NF                                                        | Oxidation of 5-hydroxymethylfurfural    | 96.7           | Electrocatalysis     | 5    |
| eFeNSCs                                                                         | FeCo-ZIF-8                                                         | Elimination of trichloroacetamide DBP   | 97             | Electrocatalysis     | 7    |
| Fe <sub>3</sub> O <sub>4</sub> -CuO@C                                           | Cu-BDC/<br>Cu-BTC                                                  | Degradation of methylene blue           | 98.65          | Photocatalysis       | 152  |
|                                                                                 |                                                                    | Bisphenol A                             | >85            |                      |      |
|                                                                                 |                                                                    | Brilliant red                           | >85            |                      |      |
|                                                                                 |                                                                    | Acid red                                | >85            |                      |      |
| ZFCN                                                                            | ZIF-8                                                              | Degradation of reactive red             | 94             | Photocatalysis       | 153  |
| Fe <sub>2</sub> O <sub>3</sub> /TiO <sub>2</sub>                                | MIL-101(Fe)                                                        | Degradation of NSAID                    | 79             | Photocatalysis       | 154  |
|                                                                                 |                                                                    | Ibuprofen                               | 91             |                      |      |
|                                                                                 |                                                                    | naproxen                                | 100            |                      |      |
| ZnO/C                                                                           | Zn-MOF                                                             | Degradation of methylene blue           | 100            | Photocatalysis       | 155  |
| C-ZnO/PVDF                                                                      | ZIF-8                                                              | Degradation of methylene blue           | >90            | Photocatalysis       | 156  |
| ZIF-67@ZIF-8                                                                    | ZIF-67 & ZIF-8                                                     | Degradation of methylene blue           | 59.2           | Photocatalysis       | 157  |
| Ag, Pd and Pt-<br>/NH <sub>2</sub> -MIL-125                                     | NH <sub>2</sub> -MIL-125                                           | Degradation of acetaminophen            | 90             | Photocatalysis       | 158  |
| CuFe <sub>2</sub> O <sub>4</sub>                                                | Fe-MOF                                                             | Degradation of rhodamine B              | 90             | Photocatalysis       | 159  |
| ZnCo <sub>2</sub> O <sub>4</sub>                                                | ZnCo-MOF                                                           | Degradation of methylene blue           | 87.9           | Photocatalysis       | 160  |
|                                                                                 |                                                                    | Rhodamine B                             | 89.5           |                      |      |
|                                                                                 |                                                                    | Crystal violet                          | 84.3           |                      |      |
| Fe <sub>2</sub> O <sub>3</sub> @Ag-<br>ZnO@C                                    | Fe-MOF                                                             | Degradation of tetracycline             | 99             | Photocatalysis       | 161  |
|                                                                                 |                                                                    | Methylene blue                          | 92             |                      |      |
| N-TiO <sub>2</sub>                                                              | NH <sub>2</sub> -MIL-125                                           | Degradation of methylene blue           | 90.5           | Photocatalysis       | 162  |
| C doped ZnO/TiO <sub>2</sub>                                                    | Zn/Ti-MOF                                                          | Degradation of rhodamine B              | 94             | Photocatalysis       | 163  |
| CeO <sub>2</sub> /NC/Ce-<br>TCPP                                                | Ce-TCPP                                                            | Degradation of rhodamine B              | >99            | Photocatalysis       | 164  |
|                                                                                 |                                                                    | Methylene blue                          | 98.6           |                      |      |
|                                                                                 |                                                                    | Oxytetracycline                         | 97.8           |                      |      |
|                                                                                 |                                                                    | Tetracycline                            | 84.5           |                      |      |
|                                                                                 |                                                                    | Methyl orange                           | 94.4           |                      |      |
| Bi <sub>2</sub> O <sub>2</sub> CO <sub>3</sub> /g-C <sub>3</sub> N <sub>4</sub> | CAU-17                                                             | Degradation of sulfamethazine           | 90.31          | Photocatalysis       | 165  |
| nCo1-NPs@NC                                                                     | Co-MOF                                                             | Selective C-O bond cleavage             | 97             | Homogenous catalysis | 51   |
| PtNi-C                                                                          | Ni-BTC                                                             | Oxidation of alcohol fuels              | 64.31          | Oxidation            | 166  |
| ZSA-1-Co <sub>3</sub> O <sub>4</sub>                                            | ZIF-67                                                             | Oxidation of toluene                    | 100            | Oxidation            | 167  |
| X-Cu-BDC(X=N<br>H <sub>2</sub> , OH, H, F & 2F)                                 | Cu-MOF                                                             | Hydrogenation of CO (C-C coupling)      | 63             | Reduction            | 8    |
| CeMO <sub>x</sub> (M = Ti,<br>Cu)                                               | CeCu-MOF                                                           | Low-temperature NO <sub>x</sub> removal | 80             | Reduction            | 168  |
| Mn-MP                                                                           | Mn <sub>3</sub> (BTC) <sub>2</sub> (H <sub>2</sub> O) <sub>6</sub> | Low-temperature NO <sub>x</sub> removal | 85             | Reduction            | 13   |
| C@Fe-800                                                                        | Fe-BDC                                                             | Reduction of 4-nitrophenol & MO         | 94 & 92.5      | Reduction            | 14   |
| Co@C                                                                            | Co-MOF                                                             | Hydrolysis of sodium borohydride        | 93.1           | Hydrolysis           | 169  |
| fBN@NiCo-LDH                                                                    | NiCo-LDH                                                           | Catalytic conversion of CO              | 100            | Interface-charring   | 15   |
| Cu/MgAl <sub>2</sub> O <sub>4</sub>                                             | Al-MOF                                                             | Catalytic conversion of methanol        | 96             | Steam reforming      | 1    |



|                                                      |                                         |                                    |       |                          |     |
|------------------------------------------------------|-----------------------------------------|------------------------------------|-------|--------------------------|-----|
| Ni/ALC                                               | Ni-MOF                                  | Acetic acid conversion             | 91.32 | Steam reforming          | 170 |
| Ni <sup>0</sup> -Al <sub>2</sub> O <sub>3</sub> -PET | Al-MOF                                  | Catalytic conversion of methanol   | n.a   | Catalytic dry reforming  | 2   |
| Fe <sub>2</sub> Co <sub>1</sub> /NPC                 | Co/Fe-MOFs                              | Degradation of tetracycline        | 91    | Electro-Fenton catalysis | 3   |
| NPs/SAs-Co@NC                                        | PAN@ZIF-67                              | Degradation of bisphenol A         | n.a   | Fenton-like catalysis    | 171 |
| Co <sub>3</sub> O <sub>4</sub> -C@FeOOH              | ZIF-67                                  | Ozonation of norfloxacin           | 56.7  | Ozonation                | 4   |
| Ru <sub>0</sub> /ZrO <sub>2</sub>                    | Ru/UiO-66                               | Hydrogenation of CO <sub>2</sub>   | 95    | Hydrogenation            | 172 |
| Co-Fe/NC@GCS                                         | ZIF-67                                  | Degradation of sulfamethoxazole    | 87.1  | Adsorption               | 173 |
| ZIF-8/PAN                                            | ZIF-8                                   | Degradation of tetracycline        | 97    | Adsorption               | 174 |
| Fe <sub>3</sub> O <sub>4</sub> @MIL-100(Fe)/β-CD     | Fe <sub>3</sub> O <sub>4</sub> @MIL-100 | Degradation of triazole fungicides | 99.7  | Adsorption               | 175 |
| NPC                                                  | ZIF-L                                   | Degradation of tetracycline        | 99.99 | Adsorption               | 176 |

Where n.a = not available.

**Table S6.** HER, ORR, OER and ECR activities of various reported MOF-derived electrocatalysts.

| Type | Catalyst                           | MOF-precursor                              | OER & HER                                  |                      | ORR                            |                              |                                       | Electrolyte                         | Ref. |
|------|------------------------------------|--------------------------------------------|--------------------------------------------|----------------------|--------------------------------|------------------------------|---------------------------------------|-------------------------------------|------|
|      |                                    |                                            | Overpotential [mV@10 mA cm <sup>-2</sup> ] | Tafel slope [mV/dec] | E <sub>onset</sub> [V vs. RHE] | E <sub>1/2</sub> [V vs. RHE] | J <sub>L</sub> [mA cm <sup>-2</sup> ] |                                     |      |
| HER  | FeNiCo@NC/NF                       | MIL-53(FeNi)/NF                            | 145                                        | 82                   | -                              | -                            | -                                     | 1M KOH                              | 177  |
| HER  | Co <sub>2</sub> P/CoNPC            | ZIF-67                                     | 130                                        | 58.2                 | -                              | -                            | -                                     | 1M KOH                              | 178  |
| HER  | Ni@N-HCGHF                         | Ni-BTC                                     | 95                                         | 57                   | -                              | -                            | -                                     | 1M KOH                              | 103  |
| HER  | ZIF-67-Pt/tGO                      | ZIF-67                                     | 14.3                                       | 12.5                 | -                              | -                            | -                                     | 0.5M H <sub>2</sub> SO <sub>4</sub> | 179  |
| HER  | MOFDC                              | Co-MOF                                     | 35                                         | 261                  | -                              | -                            | -                                     | 0.1M KOH                            | 180  |
| HER  | FeP/NPC                            | Fe-MOF                                     | 75                                         | 66                   | -                              | -                            | -                                     | 0.5M H <sub>2</sub> SO <sub>4</sub> | 181  |
| HER  | NiSe <sub>2</sub> /C/CF            | Ni-MOF                                     | 209                                        | 74.1                 | -                              | -                            | -                                     | 0.5M H <sub>2</sub> SO <sub>4</sub> | 182  |
| HER  | t-Ni/Co-MOF                        | Ni-MOF & Co-MOF                            | n.a                                        | 57                   | -                              | -                            | -                                     | 1M KOH                              | 183  |
| HER  | Cu-MOF/CeO <sub>2</sub>            | Cu-MOF                                     | 145.9                                      | 54.6                 | -                              | -                            | -                                     | 1M KOH                              | 184  |
| HER  | Cu <sub>3</sub> P/C                | HUKST-1                                    | 233                                        | 91                   | -                              | -                            | -                                     | 1M KOH                              | 185  |
| HER  | Ru-Cu@C                            | Cu-BTC                                     | 20                                         | 37                   | -                              | -                            | -                                     | 1M KOH                              | 186  |
| HER  | W-SAC                              | UiO-66-NH <sub>2</sub>                     | 85                                         | 53                   | -                              | -                            | -                                     | 1 M KOH                             | 187  |
| HER  | Fe-MoS <sub>x</sub> /C             | MIL-100 (Fe)                               | -321                                       | 62                   | -                              | -                            | -                                     | 1M KOH                              | 188  |
| HER  | Co/N-CNT@P CNF                     | ZIF-67                                     | 150                                        | 73                   | -                              | -                            | -                                     | 1M KOH                              | 189  |
| OER  | Au/Co <sub>x</sub> S <sub>y</sub>  | ZIF-67                                     | 343                                        | 62                   | -                              | -                            | -                                     | 0.1M KOH                            | 17   |
| OER  | H-2D Co/Mo <sub>2</sub> C@NC       | Co-MOF & Zn-MOF                            | 256                                        | 48                   | -                              | -                            | -                                     | 1M KOH                              | 20   |
| OER  | CoS <sub>x</sub> @MnO <sub>2</sub> | ZIF-67@MnO <sub>2</sub>                    | 329                                        | 81.4                 | -                              | -                            | -                                     | 1M KOH                              | 190  |
| OER  | CuFeN/CNT                          | Cu-MOF-H <sub>2</sub> O                    | 420                                        | 56.9                 | -                              | -                            | -                                     | 1M KOH                              | 21   |
| OER  | M-PCBN                             | PCB                                        | 232                                        | 32                   | -                              | -                            | -                                     | 1M KOH                              | 191  |
| OER  | NiCo-MOF                           | RNCMs                                      | 319                                        | 78.2                 | -                              | -                            | -                                     | 1M KOH                              | 192  |
| OER  | Co-NC/CF                           | Co-MOF/CF                                  | 246                                        | 68                   | -                              | -                            | -                                     | 1M KOH                              | 193  |
| OER  | N-doped Ni@C                       | Ni <sub>2</sub> (BDC) <sub>2</sub> (DABCO) | 307                                        | 48                   | -                              | -                            | -                                     | 1M KOH                              | 194  |
| OER  | FeNiCo@NC/NF                       | MIL-53(FeNi)/NF                            | 245                                        | 36                   | -                              | -                            | -                                     | 1M KOH                              | 177  |

|     |                                                                       |                       |       |      |       |       |       |                        |     |
|-----|-----------------------------------------------------------------------|-----------------------|-------|------|-------|-------|-------|------------------------|-----|
|     | F                                                                     | F                     |       |      |       |       |       |                        |     |
| OER | NiFe-BDC                                                              | NiFe-BDC              | 210   | 28   | -     | -     | -     | 0.1M KOH               | 195 |
| OER | Co <sub>1.6</sub> Ni <sub>0.4</sub> P <sub>4</sub> O <sub>12</sub> -C | CoNi-ZIF              | 230   | 51   | -     | -     | -     | 1M KOH                 | 196 |
| OER | Co-MNS                                                                | CoP <sub>x</sub> @CNS | 286   | 70   | -     | -     | -     | 1M KOH                 | 197 |
| OER | Ni/Co-HHTP                                                            | cMOF/LDH              | 227   | 34.1 | -     | -     | -     | 1M KOH                 | 198 |
| OER | Co <sub>2</sub> P/CoNPC                                               | ZIF-67                | 326   | 83.9 | -     | -     | -     | 1M KOH                 | 178 |
| OER | Ni@N-HCGHF                                                            | Ni-BTC                | 260   | 63   | -     | -     | -     | 1M KOH                 | 103 |
| OER | Fe-Co <sub>3</sub> O <sub>4</sub> HHNPs                               | ZIF-67                | 262   | 43   | -     | -     | -     | 1M KOH                 | 199 |
| OER | FeCo-C/N                                                              | ZIF-L                 | 353   | 102  | -     | -     | -     | 1M KOH                 | 200 |
| OER | CoMoOS                                                                | ZIF-67                | 281   | 75.4 | -     | -     | -     | 1M KOH                 | 201 |
| OER | CoSe <sub>2</sub>                                                     | ZIF-67                | 287   | 54.3 | -     | -     | -     | 1M KOH                 | 202 |
| OER | Ni-Fe LDH DSNCS                                                       | MIL-88A               | 123   | 71   | -     | -     | -     | 1M KOH                 | 203 |
| OER | CoP-NC@NFP                                                            | Co-MOF                | 270   | 46   | -     | -     | -     | 1M KOH                 | 22  |
| ORR | HNCSSs                                                                | Zn-BTC                | -     | -    | 0.92  | 0.82  | 5.34  | 0.1M KOH               | 204 |
| ORR | RNCMSs                                                                | NiCo-MOF              | -     | -    | 0.90  | 0.45  | 82.1  | 1M KOH                 | 192 |
| ORR | Pd/Co <sub>3</sub> O <sub>4</sub> -N-C                                | ZIF-67                | -     | -    | 1.1   | 0.93  | 5.88  | 0.1M KOH               | 205 |
| ORR | ZFN                                                                   | ZIF-8                 | -     | -    | n.a   | 0.85  | 190.7 | 0.1M KOH               | 206 |
| ORR | BSCF@Co-N <sub>x</sub> -C                                             | ZIF-67                | -     | -    | 0.45  | 1.56  | 5     | 0.1M KOH               | 207 |
| ORR | Ni@N-HCGHF                                                            | Ni-BTC                | -     | -    | n.a   | 0.875 | 5.87  | 0.1M KOH               | 103 |
| ORR | CoFeNi/NC                                                             | ZIF-67                | -     | -    | 0.914 | 0.842 | 2.593 | 0.1M KOH               | 208 |
| ORR | FeCo-C/N                                                              | ZIF-L                 | -     | -    | n.a   | 0.864 | 7.3   | 1M KOH                 | 200 |
| ORR | Co-Cu@CN                                                              | Cu-MOF@Co-MOF         | -     | -    | 0.06  | 0.037 | n.a   | 0.1M KOH               | 209 |
| ORR | Co-C (X-C)                                                            | ZIF-67                | -     | -    | 0.88  | 0.82  | 33.2  | 0.1M KOH               | 210 |
| ORR | GC@COF-NC                                                             | ZIF-67                | -     | -    | 0.923 | 0.841 | n.a   | 0.1K KOH               | 211 |
| ORR | Fe/N-PCNs                                                             | Zn/Fe-MOF             | -     | -    | n.a   | 0.86  | n.a   | 0.1M KOH               | 212 |
| ORR | FePPc@CB                                                              | Fe-MOF                | -     | -    | n.a   | 0.908 | 5.38  | 0.1M KOH               | 213 |
| ORR | CuPt/NC                                                               | Cu-tpa MOF            | -     | -    | 0.9   | n.a   | 4.2   | 0.1M HClO <sub>4</sub> | 214 |
| ORR | FeSAs/CNF                                                             | ZIF-8                 | -     | -    | 1.01  | 0.89  | 6.51  | 0.1M KOH               | 215 |
| ECR | FeSAs/CNF                                                             | ZIF-8                 | -0.47 | -    | -     | -     | -     | 0.5M KHCO <sub>3</sub> | 215 |

Where n.a = not available.

**Table S7.** MOF-derived and MOF-supported materials used for radiation absorptions.

| Absorber Material                                       | MOF Precursor | Absorption Bandwidth [GHz] | Thickness [mm] | Reflection loss [dB] | Radiations | Ref. |
|---------------------------------------------------------|---------------|----------------------------|----------------|----------------------|------------|------|
| CNT/Co/C                                                | ZIF-67        | 7.8                        | 2.0            | -53.5                | Microwave  | 216  |
| Fe-Co/NPC/RGO                                           | Co-MOF        | 10.1                       | 2.5            | -52.9                | Microwave  | 217  |
| FeCoNi@C                                                | FeCoNi-MOF    | 5.52                       | 3.1            | -64.75               | Microwave  | 218  |
| CoS <sub>2</sub> /NCNT                                  | ZIF-67        | 6.2                        | 1.6            | -65                  | Microwave  | 219  |
| Co-NG/CNT                                               | Co-ZIF-67     | 18                         | 1.5            | -65.45               | Microwave  | 220  |
| FeNi@CNT/CNRs                                           | FeNi-MIL-88B  | 4.5                        | 2.3            | -47.0                | EMW        | 221  |
| CoNi/C                                                  | ZIF-67        | 5.2                        | 2.0            | -61.02               | EMW        | 222  |
| Cu/C                                                    | Mo-MOF        | 6.8                        | 2.3            | -52                  | EMW        | 223  |
| CoNC/CNT                                                | CoZn-ZIF-L    | 5.2                        | 1.5            | -44.6                | EMW        | 224  |
| CoNi/MnO@C                                              | CoNiMn-MOF    | 8.0                        | 2.1            | -55.2                | EMW        | 225  |
| NiSe <sub>2</sub> -CoSe <sub>2</sub> @C/Ti <sub>3</sub> | ZIF-67        | 5.68                       | 2.6            | -60.46               | EMW        | 226  |

|                                      |                          |       |     |        |         |     |
|--------------------------------------|--------------------------|-------|-----|--------|---------|-----|
| $C_2T_x$                             |                          |       |     |        |         |     |
| Fe@NPC@CF                            | Fe-MOF                   | 5.2   | 2.5 | -46.2  | EMW     | 227 |
| FMCFs                                | Fe <sup>III</sup> -MOF-5 | 4.44  | 1.4 | -39.2  | EMW     | 228 |
| NC@Co/NC                             | ZIF-8@ZIF-67             | 4.4   | 2.2 | -52.5  | EMW     | 229 |
| Ni/NiO/Cu@C                          | Cu@C-MOF                 | na    | 3.2 | -38.1  | EMW     | 230 |
| Cu <sub>9</sub> S <sub>5</sub> /C    | HKUST-1                  | 4.7   | 1.3 | -62.3  | EMW     | 231 |
| NiFe <sub>2</sub> S <sub>4</sub> /PC | Ni-MOF/PC                | 4.08  | 1.8 | -51.41 | EMW     | 232 |
| TiO <sub>2</sub> /ZrTiO <sub>4</sub> | TiZr-MOF                 | 5.9   | 2.7 | -67.8  | EMW     | 233 |
| MPC@Ni/C                             | Ni-MOF                   | 5.8   | 2.2 | -73.8  | EMW     | 234 |
| CuO                                  | Cu-MOF                   | 0.238 | n.a | 55     | Near IR | 235 |

Where n.a = not available.

## List of abbreviations

PET = polyethylene terephthalate

NPC = N-doped porous carbon

NPs = nanoparticles

SAs = single-atom sites catalysts

PAN = polyacetonitrile

ZIF-L = leaf-like zeolite imidazole framework

NF = nickel foam

GF = graphite felt

eFeNSCs = electron-rich Fe-N<sub>4</sub> single site catalysts

BDC = benzene dicarboxylate

NSC = nano sheet of carbon

GO = graphene oxide

Co/CN-x = Co-based N-doped carbon catalysts

TCPP = tetra(4-carboxyphenyl) porphine

fBN = few-layered boron nitride

Mo<sub>2</sub>TiC<sub>2</sub>T<sub>x</sub> = Titanium and molybdenum carbide

LDH = layered double hydroxides

GMN = gold multipod nanoparticles

CC = carbon cloth

H-2D Co/Mo<sub>2</sub>C@NC = hydrangea type 2D Co and Mo carbide

N-TC = N-doped TiO<sub>2</sub>/C support

NC = N-doped carbon

NRs = nanorods

PNS = porous nanosheets

NCNTs = N-doped carbon nanotubes

Ni-Fe-O = Nickel iron oxide (mixed metal oxide)

MX@ZCO = MXene@ZnCo<sub>2</sub>O<sub>4</sub>

ZCM = ZnCo-MOF

Ni-Zn-P = nickel zinc phosphide

Zn-Co-S = zinc cobalt sulphide

CNF = carbon nanofibers

PCNFs = porous carbon nanofibers

NCs = nanocages

Bi/Bi<sub>2</sub>O<sub>3</sub>-C = carbon encapsulated Bi/Bi<sub>2</sub>O<sub>3</sub> heretostructures

HPCO = hierarchical porous carbon octahedrons

CTs = carbon textiles

BTC = 1,3,5-benzene tricarboxylate

PVP = polyvinylpyrrolidone

Si NDs = Si nanodots

MDNs = MOF-derived nanoreactors

RGO = reduced graphene oxide

NC/KB = N-doped porous Ketjen Black

BMZIF = bimetallic zinc imidazolate framework

Bpdc = biphenyl-4,4'-dicarboxylate

CZIF = carbonized ZIF

LCO = LiCoO<sub>2</sub>

ACF = Au-coated copper foam

IPC = 4-(imidazole-1-yl) phthalic acid

ZOMC = ZIF derived ordered macroporous carbon

ZGC = ZnO nanoclusters anchored in N-doped amorphous carbon modified graphene

SDA = 4,4'-stilbenedicarboxylate

DMF = dimethyl formamide

ES-CNC<sub>3</sub>O<sub>4</sub>@rGO = Co<sub>3</sub>O<sub>4</sub>/N-doped hierarchical porous carbon nanofibers with reduced graphitic oxide

MCS<sub>e</sub> = molybdenum/cobalt binary metal selenide

MIL = materials of Institute Lavoisier frameworks

CM53 = carbonized MIL-53

HNCSs = hollow N-doped carbon spheres

NHC = N-doped hollow carbon

RNCMs = regrown nickel cobalt MOFs

MPC = microporous carbon  
NS-C = N,S dual doped carbon  
PCB = Poly [Co<sub>2</sub>(benzimidazole)<sub>4</sub>]  
M-PCBN = metal oxide nanoparticle embedded PCB nanosheets  
NHCP = nitrogen-doped hollow carbon polyhedrons  
DABCO = ,4-diazabicyclo[2.2.2]octane  
SURMOF = surface mounted MOFs  
ZFN = N-doped carbon network encapsulated Fe<sub>3</sub>N  
BSCF = Ba<sub>0.5</sub>Sr<sub>0.5</sub>Co<sub>0.8</sub>Fe<sub>0.2</sub>O<sub>3</sub>  
Co-MNS = Co-MOF nanosheets  
CNS = carbon nanosheets  
HHTP = 2,3,6,7,10,11-hexahydroxytriphenylene  
cMOF = conductive MOF  
Ni@N-HCGHF = hollow-microsphere (HM) Ni-MOF derived N-doped CNT/rGO heterostructure film  
PC@PFN = Pt-Co alloy NPs on the Pt free nanowire  
HHNPs = hierarchically hollow nanoparticles  
C-FeHZ8 = hollow ZIF-8 carbon polyhedra doped with Fe and N  
COF = covalent organic framework  
PCNs = Porous carbon nanosheets  
FePPc = iron polyphthalocyanine  
CB = carbon black  
AC = activated carbon  
tpa = terephthalic acid  
FeSAs/CNF = Fe-single atoms embedded carbon nanoframes  
OER = oxygen evolution reaction  
ORR = oxygen evolution reaction  
NRR = nitrogen reduction reaction  
ECR = electrochemical carbon dioxide reduction  
CoMoS = CoMoO<sub>x</sub>/CoMoS<sub>x</sub>/CoS<sub>x</sub>  
DSNCs = double shelled nanocages  
MOFDC = metal organic framework derived carbon  
DEA = diethyl amine  
TEA = triethylamine  
CPP = coordination polymer particles

MBioFs = metal biomolecules frameworks  
BC = biomass carbon  
MIL = molecularly imprinted polymers  
CBT = copper-4,4'-bipyridine-trimesic acid  
HITP = 2,3,6,7,10,11-hexaminotriphenylene  
NFA = nanofibers array  
TMOM = trimetallic organic material  
NHs = nano heterojunctions  
HKUST-1 =  $\text{Cu}_3(\text{benzenetricarboxylate})_2$   
F@PDMS@HKUST-1 = functionalized films of polydimethyl siloxane coated HKUST-1  
QCM = quartz crystal microbalance  
NCNFs = nitrogen-doped porous carbon nanofibers  
ZFCN = ZIF-8/ $\text{Fe}_2\text{O}_3$  composite nanofibers  
PVDF = poly(vinylidene fluoride)  
W-SAC = tungsten containing single atom catalysts  
DUT = Dresden University of Technology  
SPAC = spherical-like activated porous carbon  
IM-HPC = hierarchical porous carbon with interconnected macropores  
PPy = polypyrrole  
NCSG = Ni-Co sulfide nanotubes/graphene oxide  
NFO =  $\text{NiFe}_2\text{O}_4$   
ALC =  $\text{Al}_2\text{O}_3/\text{La}_2\text{O}_3/\text{CeO}_2$   
ZTNs-Ce20 = Ce-Doped  $\text{ZnIn}_2\text{S}_4$  tetrakaidecahedron hollow nanocages  
UiOS = thiol functionalized UiO-66  
GSC = glutaraldehyde-crosslinked chitosan  
rh/c = rhombohedral corundum  
HPCN = hollow porous carbon nanofibers  
HNCs = homobimetallic hollow nanocages  
CD = cyclodextrin  
PDA = polydopamine  
TFN = thin film nanocomposites  
TpPa = COF synthesized by 1,3,5-triformylphloroglucinol (Tp) and 2,5-dimethyl-*p*-phenylenediamine (Pa-2)  
p(XA) = polyxanthuronic acid

MNPs = magnetic nanoparticles

HMF = hydroxymethylfurfural

NDC = nitrogen doped-carbon

NA = nanorod array

POPs = persistent organic pollutants

ILCS = ionic liquid modified chitosan.

## References

1. N. Kamyar, Y. Khani, M. M. Amini, F. Bahadoran and N. Safari, *International Journal of Hydrogen Energy*, 2020, **45**, 21341-21353.
2. L. Karam, A. Miglio, S. Specchia, N. El Hassan, P. Massiani and J. Reboul, *Materials Advances*, 2021, **2**, 2750-2758.
3. T. Hu, F. Deng, H. Feng, J. Zhang, B. Shao, C. Feng, W. Tang and L. Tang, *Applied Materials Today*, 2021, **24**, 101161.
4. H. Chen and J. Wang, *Journal of hazardous materials*, 2021, **403**, 123697.
5. Y. Feng, H. Guo, R. L. Smith Jr and X. Qi, *Journal of Colloid and Interface Science*, 2023, **632**, 87-94.
6. L.-F. Zhai, Y.-Y. Chen, Y. Hu, Y.-X. Pan, M. Sun, J. Yu, Y. Wang and W. Kong, *Journal of Hazardous Materials*, 2022, **439**, 129670.
7. Y.-Y. Lou, S.-H. Yin, J. Yang, L.-F. Ji, J.-Y. Fang, S.-Q. Zhang, M.-B. Feng, X. Yu, Y.-X. Jiang and S.-G. Sun, *Chemical Engineering Journal*, 2022, **446**, 137060.
8. R. Chen, L. Cheng, J. Liu, Y. Wang, W. Ge, C. Xiao, H. Jiang, Y. Li and C. Li, *Small*, 2022, **18**, 2200720.
9. M. Liu, Y. Liu, X. Liu, C. Chu, D. Yao and S. Mao, *Separation and Purification Technology*, 2022, **301**, 121967.
10. C. Zhang, H. Gao, G. Hai, Y. Zeng, X. Wang, L. Xing, J. Zhao, G. Wang and X. Shu, *Journal of Colloid and Interface Science*, 2022, **607**, 1836-1848.
11. M. Zhang, Z. Chen, J. Ruan, W. Shao, W. Wei, W. Zhang, W. Qiao and J. Li, *Separation and Purification Technology*, 2023, **305**, 122407.
12. S. Zhao, Y. Long, Y. Su, S. Wang, Z. Zhang and X. Zhang, *Small*, 2021, **17**, 2101393.
13. R. Chen, X. Fang, Z. Li and Z. Liu, *Applied Catalysis A: General*, 2022, **643**, 118754.
14. M. A. Ahsan, E. Deemer, O. Fernandez-Delgado, H. Wang, M. L. Curry, A. A. El-Gendy and J. C. Noveron, *Catalysis Communications*, 2019, **130**, 105753.
15. X.-D. Zhang, Z. Li, L.-Y. Jiang, Q.-Q. Bi, H.-F. Li, J. Wang, J. de la Vega and D.-Y. Wang, *Applied Surface Science*, 2023, 156316.
16. H. D. Mai, V. C. T. Le and H. Yoo, *ACS Applied Nano Materials*, 2019, **2**, 678-688.
17. N. M. Tran, S. Kim and H. Yoo, *Journal of Colloid and Interface Science*, 2022, **605**, 274-285.
18. Y. Wu, S. Song, X. Chen, Y. Shi, H. Cui, Y. Liu and S. Yang, *Science of The Total Environment*, 2023, **854**, 158792.
19. J. Zhang, W. Zhang, J. Zhang, Y. Li, Y. Wang, L. Yang and S. Yin, *Journal of Alloys and Compounds*, 2023, **935**, 167974.
20. C. H. Ahn, W. S. Yang, J. J. Kim, G. S. Priyanga, T. Thomas, N. G. Deshpande, H. S. Lee and H. K. Cho, *Chemical Engineering Journal*, 2022, **435**, 134815.
21. Y. Choi, D. Kim, L. Lin, B. Yan, H. Hong, X. Qin and Y. Piao, *Electrochimica Acta*, 2021, **389**, 138637.

22. E. Vijayakumar, S. Ramakrishnan, C. Sathiskumar, D. J. Yoo, J. Balamurugan, H. S. Noh, D. Kwon, Y. H. Kim and H. Lee, *Chemical Engineering Journal*, 2022, **428**, 131115.
23. B. Yan, D. Liu, X. Feng, M. Shao and Y. Zhang, *Advanced Functional Materials*, 2020, **30**, 2003007.
24. H.-Y. Zheng, X. Lian, S.-J. Qin and B. Yan, *ACS omega*, 2018, **3**, 12513-12519.
25. J. Othong, J. Boonmak, F. Kielar, S. Hadsadee, S. Jungstittiwong and S. Youngme, *Sensors and Actuators B: Chemical*, 2020, **316**, 128156.
26. M. Cao, Y. Zou, Y. Zhang, T. Zeng, Q. Wan, G. Lai and N. Yang, *Electrochimica Acta*, 2022, **409**, 139967.
27. Y. Qin, Y. Sun, Y. Li, C. Li, L. Wang and S. Guo, *Chinese Chemical Letters*, 2020, **31**, 774-778.
28. X. Zhang, W. Lan, J. Xu, Y. Luo, J. Pan, C. Liao, L. Yang, W. Tan and X. Huang, *Sensors and Actuators B: Chemical*, 2019, **289**, 144-152.
29. E. Cao, Z. Guo, G. Song, Y. Zhang, W. Hao, L. Sun and Z. Nie, *Sensors and Actuators B: Chemical*, 2020, **325**, 128783.
30. Y. Fan, W. Wang, J. Zhang, Y. Lu, C. Liu, S. Adimi, J. Zhou, S. Ruan and Y. Chen, *Sensors and Actuators B: Chemical*, 2021, **344**, 130129.
31. Y. Zhang, C. Jia, Q. Kong, N. Fan, G. Chen, H. Guan and C. Dong, *ACS applied materials & interfaces*, 2020, **12**, 26161-26169.
32. R. Mo, D. Han, C. Yang, J. Tang, F. Wang and C. Li, *Sensors and Actuators B: Chemical*, 2021, **330**, 129326.
33. M. Wang, T. Hou, Z. Shen, X. Zhao and H. Ji, *Sensors and Actuators B: Chemical*, 2019, **292**, 171-179.
34. Z. Yang, D. Zhang and H. Chen, *Sensors and Actuators B: Chemical*, 2019, **300**, 127037.
35. P. Yue, Y. Zhang and X. Wu, *Journal of Energy Storage*, 2023, **58**, 106320.
36. N. Kitchamsetti and D. Kim, *Electrochimica Acta*, 2023, 141824.
37. A. Karimi, A. A. Ensafi and B. Rezaei, *Fuel*, 2023, **334**, 126536.
38. D. Acharya, I. Pathak, B. Dahal, P. C. Lohani, R. M. Bhattarai, A. Muthurasu, T. Kim, T. H. Ko, K. Chhetri and H. Y. Kim, *Carbon*, 2023, **201**, 12-23.
39. S. Dai, F. Han, J. Tang and W. Tang, *Electrochimica Acta*, 2019, **328**, 135103.
40. Z. Jia, Y. Wang, J. Chen, Z. Cao, S. Pan, Y. Zhou, J. Sun, J. Zhu, X. Wang and Y. Fu, *Chinese Chemical Letters*, 2023, **34**, 107137.
41. P. Zhang, Y. Wei, S. Zhou, R. A. Soomro, M. Jiang and B. Xu, *Journal of Colloid and Interface Science*, 2023, **630**, 365-374.
42. L. Wang, G. Zhu, Y. Lin, Y. Wang, Q. Zhu and Z. Dai, *Carbon*, 2023, **202**, 305-313.
43. T. Wan, E. Wang, C. Wu, J. Li, Z. Zhang and G. Liu, *Electrochimica Acta*, 2023, **439**, 141570.
44. B. Chen, L. Chen, L. Zu, Y. Feng, Q. Su, C. Zhang and J. Yang, *Advanced Materials*, 2022, **34**, 2200894.
45. M. Wang, X. Liu, B. Qin, Z. Li, Y. Zhang, W. Yang and H. Fan, *Chemical Engineering Journal*, 2023, **451**, 138508.
46. W. Li, Q. Xu, D. Kong, H. Yang, T. Xu, H. Wang, J. Zang, S. Huang, X. Li and Y. Wang, *Chemical Engineering Journal*, 2023, **452**, 139251.
47. Y. Tong, Y. Zhao, M. Luo, S. Su, Y. Yang, Y. Zang, X. Li, L. Wang and J. Fang, *Journal of Alloys and Compounds*, 2023, **932**, 167681.
48. S. Ren, X. Duan, F. Ge, Z. Chen, Q. Yang, M. Zhang and H. Zheng, *Chemical Engineering Journal*, 2022, **427**, 131614.
49. F. Li, C. Li, Q. Xie, X. Chen, X.-Z. Tang and T. Guo, *Journal of Alloys and Compounds*, 2023, **935**, 168106.
50. J. Pan, X. Li, W. Xia, H. Qu, J. Li, C. Jiang, T. Wang and J. He, *Chemical Engineering Journal*, 2023, **452**, 139601.



51. B. Wang, P. Zhou, X. Yan, H. Li, H. Wu and Z. Zhang, *Journal of Energy Chemistry*, 2023, DOI: <https://doi.org/10.1016/j.jechem.2022.12.020>.
52. C. Yao, J. Xu, Y. Zhu, R. Zhang, Y. Shen and A. Xie, *Applied Surface Science*, 2020, **513**, 145777.
53. J. Lin, C. Zeng, L. Wang, Y. Pan, X. Lin, R. C. K. Reddy, Y. Cai and C.-Y. Su, *Applied Materials Today*, 2020, **19**, 100565.
54. J. Lin, C. Zeng, Y. Chen, X. Lin, C. Xu and C.-Y. Su, *Journal of materials chemistry A*, 2020, **8**, 6607-6618.
55. Y. Liu, X. Que, X. Wu, Q. Yuan, H. Wang, J. Wu, Y. Gui and W. Gan, *Materials Today Chemistry*, 2020, **17**, 100284.
56. Q. Cheng, Y. Chen, X. Lin, J. Liu, Z. Yuan and Y. Cai, *The Journal of Physical Chemistry C*, 2020, **124**, 8624-8632.
57. F. Xiao, X. Yang, D. Wang, H. Wang, D. Y. Yu and A. L. Rogach, *ACS applied materials & interfaces*, 2020, **12**, 12809-12820.
58. C. Zhao, S. Xiong, H. Li, Z. Li, C. Qi, H. Yang, L. Wang, Y. Zhao and T. Liu, *Journal of Power Sources*, 2021, **483**, 229188.
59. T. Zhou, J. Shen, Z. Wang, J. Liu, R. Hu, L. Ouyang, Y. Feng, H. Liu, Y. Yu and M. Zhu, *Advanced Functional Materials*, 2020, **30**, 1909159.
60. H. Li, B.-R. Lu, W.-D. Zhang, F.-H. Cao, H. Li and C.-L. Zhang, *Energy Technology*, 2020, **8**, 2000209.
61. R. Gao, J. Tang, X. Yu, S. Tang, K. Ozawa, T. Sasaki and L.-C. Qin, *Nano Energy*, 2020, **70**, 104444.
62. F. Xue, Y. Li, C. Liu, Z. Zhang, J. Lin, J. Hao and Q. Li, *Inorganic Chemistry Frontiers*, 2021, **8**, 3363-3370.
63. X. Zhao, H. Xu, Z. Hui, Y. Sun, C. Yu, J. Xue, R. Zhou, L. Wang, H. Dai and Y. Zhao, *Small*, 2019, **15**, 1904255.
64. Y. Zhang, M. Li, S. Zhong, Y. Sui, X. Zhang, X. Li and L. Wu, *Ceramics International*, 2020, **46**, 9614-9621.
65. Y. Li, G. Chen, J. Mou, Y. Liu, S. Xue, T. Tan, W. Zhong, Q. Deng, T. Li and J. Hu, *Energy Storage Materials*, 2020, **28**, 196-204.
66. Z. Zhang, S. Zhou, T. Mei, Y. Gou, F. Xie, C. Liu and X. Wang, *Dalton Transactions*, 2020, **49**, 8591-8600.
67. C. Wang, H. Song, C. Yu, Z. Ullah, Z. Guan, R. Chu, Y. Zhang, L. Zhao, Q. Li and L. Liu, *Journal of Materials Chemistry A*, 2020, **8**, 3421-3430.
68. W. Zhang, G. Cai, R. Wu, Z. He, H. B. Yao, H. L. Jiang and S. H. Yu, *Small*, 2021, **17**, 2004140.
69. Z. Ye, Y. Jiang, L. Li, F. Wu and R. Chen, *Advanced Materials*, 2021, **33**, 2101204.
70. A. Chatterjee and S. W. Or, *Electrochimica Acta*, 2020, **338**, 135809.
71. J. Li, Y. Deng, L. Leng, M. Liu, L. Huang, X. Tian, H. Song, X. Lu and S. Liao, *Journal of Power Sources*, 2020, **450**, 227725.
72. W. Wang, Y. Yang, Y. NuLi, J. Zhou, J. Yang and J. Wang, *Journal of Power Sources*, 2020, **445**, 227325.
73. D. Skoda, T. Kazda, L. Munster, B. Hanulikova, A. Styskalik, P. Eloy, D. P. Debecker, J. Vilcakova, O. Cech and L. Simonikova, *Journal of Energy Storage*, 2020, **27**, 101113.
74. X. Huang, S. Men, H. Zheng, D. D. Qin and X. Kang, *Chemistry—An Asian Journal*, 2020, **15**, 1456-1463.
75. Z. Sun, X. L. Wu, J. Xu, D. Qu, B. Zhao, Z. Gu, W. Li, H. Liang, L. Gao and Y. Fan, *Small*, 2020, **16**, 1907670.
76. X. Wang, W. Zhao, W. Zhang, K. W. Wong, J. Wu, T. Chen and S. Huang, *ACS Sustainable Chemistry & Engineering*, 2021, **9**, 11705-11713.
77. J. H. Na, Y. C. Kang and S.-K. Park, *Chemical Engineering Journal*, 2021, **425**, 131651.

78. B. Zhang, Y. Zhang, J. Li, J. Liu, X. Huo and F. Kang, *Journal of Materials Chemistry A*, 2020, **8**, 5535-5545.
79. Y. Tong, Y. Zhao, M. Luo, S. Su, Y. Yang, Y. Zang, X. Li, L. Wang and J. Fang, *Journal of Alloys and Compounds*, 2023, **932**, 167681.
80. K. Sun, Y. Shen, J. Min, J. Pang, Y. Zheng, T. Gu, G. Wang and L. Chen, *Chemical Engineering Journal*, 2023, **454**, 140394.
81. J. W. Wang, Y. F. Yuan, D. Zhang, M. Zhu, C. L. Mo and S. Y. Guo, *Nanotechnology*, 2021, **32**, 435401.
82. Z. Li, Q. Jiao, S.-a. He, G. He, Z. Cen, F. Yang, R. Zou and K. Xu, *Dalton Transactions*, 2021, **50**, 17538-17548.
83. L. Cheng, J. Chen, Y. Yan, J. Zhang, H. Hu, J. Zhang, Y. Luo, Y. Chen, G. Wang and R. Wang, *Chemical Physics Letters*, 2021, **778**, 138772.
84. F. Tang, J. Gao, Q. Ruan, X. Wu, X. Wu, T. Zhang, Z. Liu, Y. Xiang, Z. He and X. Wu, *Electrochimica Acta*, 2020, **353**, 136570.
85. Y. Huo, Y. Teng, K. Cai and H. Chen, *Journal of Alloys and Compounds*, 2021, **855**, 157398.
86. S.-C. Ma, M. Sun, S.-X. Wang, D.-S. Li, W.-L. Liu, M.-M. Ren, F.-G. Kong, S.-J. Wang and Y.-M. Xia, *Scripta Materialia*, 2021, **194**, 113707.
87. M. Mao, X. Wu, Y. Hu, Q. Yuan, Y.-B. He and F. Kang, *Journal of Energy Chemistry*, 2021, **52**, 277-283.
88. X. Wang, B. Zhang, J. Feng, L. Wang, B. Wu, J. Zhang, X. Ou, F. Hou and J. Liang, *Sustainable Materials and Technologies*, 2020, **26**, e00236.
89. Z. Sheng, P. Qi, Y. Lu, G. Liu, M. Chen, X. Gan, Y. Qin, K. Hao and Y. Tang, *ACS Applied Materials & Interfaces*, 2021, **13**, 34495-34506.
90. P. Xue, C. Guo, L. Li, H. Li, D. Luo, L. Tan and Z. Chen, *Advanced Materials*, 2022, **34**, 2110047.
91. S. Deng, Z. Yuan, Z. Tie, C. Wang, L. Song and Z. Niu, *Angewandte Chemie International Edition*, 2020, **59**, 22002-22006.
92. Y. Zeng, Y. Wang, Q. Jin, Z. Pei, D. Luan, X. Zhang and X. W. Lou, *Angewandte Chemie*, 2021, **133**, 25997-26002.
93. Y. Fu, Q. Wei, G. Zhang, X. Wang, J. Zhang, Y. Hu, D. Wang, L. Zuin, T. Zhou and Y. Wu, *Advanced Energy Materials*, 2018, **8**, 1801445.
94. Q. Tan, X. Li, B. Zhang, X. Chen, Y. Tian, H. Wan, L. Zhang, L. Miao, C. Wang and Y. Gan, *Advanced Energy Materials*, 2020, **10**, 2001050.
95. X. Duan, S. Ren, N. Pan, M. Zhang and H. Zheng, *Journal of Materials Chemistry A*, 2020, **8**, 9355-9363.
96. D. Chen, J. Yu, Z. Cui, Q. Zhang, X. Chen, J. Sui, H. Dong, L. Yu and L. Dong, *Electrochimica Acta*, 2020, **331**, 135394.
97. L. Li, L. Fu, R. Wang, J. Sun, X. Li, C. Fu, L. Fang and W. Zhang, *Electrochimica Acta*, 2020, **344**, 136145.
98. L. Feng, R. Ding, Y. Chen, J. Wang and L. Xu, *Journal of Power Sources*, 2020, **452**, 227837.
99. S. Yang, X. Xue, J. Zhang, X. Liu, C. Dai, Q. Xu, J. Lian, Y. Zhao, G. Li, H. Li and S. Yuan, *Chemical Engineering Journal*, 2020, **395**, 125064.
100. A. I. Douka, Y. Xu, H. Yang, S. Zaman, Y. Yan, H. Liu, M. A. Salam and B. Y. Xia, *Advanced Materials*, 2020, **32**, 2002170.
101. Y.-W. Li, W.-J. Zhang, J. Li, H.-Y. Ma, H.-M. Du, D.-C. Li, S.-N. Wang, J.-S. Zhao, J.-M. Dou and L. Xu, *ACS Applied Materials & Interfaces*, 2020, **12**, 44710-44719.
102. J. Yan, X. Zheng, C. Wei, Z. Sun, K. Zeng, L. Shen, J. Sun, M. H. Rummeli and R. Yang, *Carbon*, 2021, **171**, 320-328.

103. L. Yan, Y. Xu, P. Chen, S. Zhang, H. Jiang, L. Yang, Y. Wang, L. Zhang, J. Shen and X. Zhao, *Advanced Materials*, 2020, **32**, 2003313.
104. B. Hosseinzadeh, B. Nagar, R. Benages-Vilau, P. Gomez-Romero and S. H. Kazemi, *Electrochimica Acta*, 2021, **389**, 138657.
105. Y. Zhou, X. Li, J. Li, S. Yin, D. Shen, C. Li, P. Huo, H. Wang, Y. Yan and S. Yuan, *Chemical Engineering Journal*, 2019, **378**, 122242.
106. J. Gu, L. Sun, Y. Zhang, Q. Zhang, X. Li, H. Si, Y. Shi, C. Sun, Y. Gong and Y. Zhang, *Chemical Engineering Journal*, 2020, **385**, 123454.
107. Y. Zhang, J. Ding, W. Xu, M. Wang, R. Shao, Y. Sun and B. Lin, *Chemical Engineering Journal*, 2020, **386**, 124030.
108. W. Liu, F. Zhu, B. Ge, L. Sun, Y. Liu and W. Shi, *Chemical Engineering Journal*, 2022, **427**, 130788.
109. G. Jiang, S. Osman, R. A. Senthil, Y. Sun, X. Tan and J. Pan, *Journal of Energy Storage*, 2022, **49**, 104071.
110. K. Chhetri, T. Kim, D. Acharya, A. Muthurasu, B. Dahal, R. M. Bhattarai, P. C. Lohani, I. Pathak, S. Ji and T. H. Ko, *Chemical Engineering Journal*, 2022, **450**, 138363.
111. S. Liu, L. Kang, J. Zhang, E. Jung, S. Lee and S. C. Jun, *Energy Storage Materials*, 2020, **32**, 167-177.
112. G. Nagaraju, S. C. Sekhar, B. Ramulu and J. S. Yu, *Energy Storage Materials*, 2021, **35**, 750-760.
113. V. Elayappan, P. A. Shinde, G. K. Veerasubramani, S. C. Jun, H. S. Noh, K. Kim, M. Kim and H. Lee, *Dalton Transactions*, 2020, **49**, 1157-1166.
114. S. Zheng, Q. Li, H. Xue, H. Pang and Q. Xu, *National science review*, 2020, **7**, 305-314.
115. T. Mukhiya, A. P. Tiwari, K. Chhetri, T. Kim, B. Dahal, A. Muthurasu and H. Y. Kim, *Chemical Engineering Journal*, 2021, **420**, 129679.
116. S. Shin and M. W. Shin, *Applied Surface Science*, 2021, **540**, 148295.
117. P. Sun, J. Zhang, J. Huang, L. Wang, P. Wang, C. Cai, M. Lu, Z. Yao and Y. Yang, *Materials Research Bulletin*, 2021, **137**, 111196.
118. Y. Yang, M.-L. Li, J.-N. Lin, M.-Y. Zou, S.-T. Gu, X.-J. Hong, L.-P. Si and Y.-P. Cai, *Inorganic Chemistry*, 2020, **59**, 2406-2412.
119. Q. Li, Z. Dai, J. Wu, W. Liu, T. Di, R. Jiang, X. Zheng, W. Wang, X. Ji and P. Li, *Advanced Energy Materials*, 2020, **10**, 1903750.
120. V. Shrivastav, S. Sundriyal, K. H. Kim, R. K. Sinha, U. K. Tiwari and A. Deep, *International Journal of Energy Research*, 2020, **44**, 6269-6284.
121. Y.-P. Liu, X.-H. Qi, L. Li, S.-H. Zhang and T. Bi, *Ceramics International*, 2019, **45**, 17216-17223.
122. L. Wei, J. Li, R. Chen, Q. Wu and J. Li, *Journal of Nanoparticle Research*, 2022, **24**, 230.
123. P. Patil, S. Shingte, V. Karade, J. Kim, T. Dongale, S. Mujawar, A. Patil and P. Patil, *Journal of Energy Storage*, 2021, **40**, 102821.
124. J. Pokharel, A. Gurung, A. Baniya, W. He, K. Chen, R. Pathak, B. S. Lamsal, N. Ghimire and Y. Zhou, *Electrochimica Acta*, 2021, **394**, 139058.
125. S. Kumaraguru, J. Yesuraj and S. Mohan, *Composites Part B: Engineering*, 2020, **185**, 107767.
126. D. Tian, N. Song, M. Zhong, X. Lu and C. Wang, *ACS applied materials & interfaces*, 2019, **12**, 1280-1291.
127. H. Zhang, Z. Li, Z. Hou, H. Mei, Y. Feng, B. Xu and D. Sun, *Chemical Engineering Journal*, 2021, **425**, 130602.
128. N. Ingle, S. Mane, P. Sayyad, G. Bodkhe, T. Al-Gahouari, M. Mahadik, S. Shirsat and M. D. Shirsat, *Frontiers in Materials*, 2020, **7**, 93.
129. N. Ingle, P. Sayyad, M. Deshmukh, G. Bodkhe, M. Mahadik, T. Al-Gahouari, S. Shirsat and M. D. Shirsat, *Applied Physics A*, 2021, **127**, 1-10.
130. S. Li, L. Xie, M. He, X. Hu, G. Luo, C. Chen and Z. Zhu, *Sensors and Actuators B: Chemical*, 2020, **310**, 127828.

131. J. Tan, S. Hussain, C. Ge, M. Zhan, J. Liu, S. Liu, G. Liu and G. Qiao, *Journal of Hazardous Materials*, 2020, **400**, 123155.
132. X. Wu, S. Xiong, Y. Gong, Y. Gong, W. Wu, Z. Mao, Q. Liu, S. Hu and X. Long, *Sensors and Actuators B: Chemical*, 2019, **292**, 32-39.
133. M. Daraee, E. Ghasemy and A. Rashidi, *Journal of Environmental Chemical Engineering*, 2020, **8**, 104351.
134. Y. Zhou, T. Zhou, Y. Zhang, L. Tang, Q. Guo, M. Wang, C. Xie and D. Zeng, *Solid State Ionics*, 2020, **350**, 115278.
135. J. Mu, X. Zhong, W. Dai, X. Pei, J. Sun, J. Zhang, W. Luo and W. Zhou, *Molecules*, 2022, **27**, 2131.
136. T. Zhou, R. Zhang, Y. Wang and T. Zhang, *Sensors and Actuators B: Chemical*, 2019, **281**, 885-892.
137. K. Xu, W. Zhao, X. Yu, S. Duan and W. Zeng, *Physica E: Low-dimensional Systems and Nanostructures*, 2020, **118**, 113869.
138. S. Wu, X. Li, Y. Xu, J. Wu, Z. Wang, Y. Han and X. Zhang, *Ceramics International*, 2018, **44**, 19390-19396.
139. T. Zhou, S. Chen, X. Wang, C. Xie and D. Zeng, *ACS Applied Materials & Interfaces*, 2020, **12**, 48948-48956.
140. D. Zhang, Y. Fan, G. Li, W. Du, R. Li, Y. Liu, Z. Cheng and J. Xu, *Sensors and Actuators B: Chemical*, 2020, **302**, 127187.
141. X. Huang, S. Yan, D. Deng, L. Zhang, R. Liu and Y. Lv, *ACS applied materials & interfaces*, 2021, **13**, 3471-3480.
142. G. Zhang, X.-Z. Song, X.-F. Wang, N. Liu, X. Li, Z. Wei, G. Qian, Z. Wang, S. Yu and Z. Tan, *Journal of Alloys and Compounds*, 2022, **902**, 163803.
143. N. Zhang, L. Yan, Y. Lu, Y. Fan, S. Guo, S. Adimi, D. Liu and S. Ruan, *Chinese Chemical Letters*, 2020, **31**, 2071-2076.
144. J. Sun, L. Sun, S. Bai, H. Fu, J. Guo, Y. Feng, R. Luo, D. Li and A. Chen, *Sensors and Actuators B: Chemical*, 2019, **285**, 291-301.
145. Z. Ma, T. Yuan, Y. Fan, L. Wang, Z. Duan, W. Du, D. Zhang and J. Xu, *Sensors and Actuators B: Chemical*, 2020, **311**, 127365.
146. A. Hussain, X. Zhang, Y. Shi, F. A. Bushira, T. H. Barkae, K. Ji, Y. Guan, W. Chen and G. Xu, *Analytical Chemistry*, 2023.
147. Q. Wei, J. Sun, P. Song, J. Li, Z. Yang and Q. Wang, *Sensors and Actuators B: Chemical*, 2020, **304**, 127306.
148. M. Liu, W. Jiang, P. Song, J. Ji and Q. Wang, *Inorganic Chemistry Communications*, 2022, **140**, 109455.
149. Q. Wei, J. Sun, P. Song, J. Li, Z. Yang and Q. Wang, *Sensors and Actuators B: Chemical*, 2020, **317**, 128205.
150. Y. Li, K. Li, Y. Luo, B. Liu, H. Wang, L. Gao and G. Duan, *Sensors and Actuators B: Chemical*, 2020, **308**, 127657.
151. D. Wang, P. Xiao, K. Gu, X. Liang and M. Zhang, *Sensors and Actuators B: Chemical*, 2021, **343**, 130115.
152. L. Qin, R. Ru, J. Mao, Q. Meng, Z. Fan, X. Li and G. Zhang, *Applied Catalysis B: Environmental*, 2020, **269**, 118754.
153. N. M. Mahmoodi, S. Keshavarzi, M. Oveisi, S. Rahimi and B. Hayati, *Journal of Molecular Liquids*, 2019, **291**, 111333.
154. G. Pena-Velasco, L. Hinojosa-Reyes, G. A. Moran-Quintanilla, A. Hernandez-Ramirez, M. Villanueva-Rodriguez and J. L. Guzman-Mar, *Ceramics International*, 2021, **47**, 24632-24640.
155. C. Hu, X. Hu, R. Li and Y. Xing, *Journal of hazardous materials*, 2020, **385**, 121599.

156. T. Tang, C. Li, W. He, W. Hong, H. Zhu, G. Liu, Y. Yu and C. Lei, *Journal of Alloys and Compounds*, 2022, **894**, 162559.
157. C. Liu, Q. Sun, L. Lin, J. Wang, C. Zhang, C. Xia, T. Bao, J. Wan, R. Huang, J. Zou and C. Yu, *Nature Communications*, 2020, **11**, 4971.
158. V. Muelas-Ramos, C. Belver, J. Rodriguez and J. Bedia, *Separation and Purification Technology*, 2021, **272**, 118896.
159. S. Hariganesh, S. Vadivel, M. Kumaravel, N. Balasubramanian, S. Rajendran and S. S. Dhar, *Inorganic Chemistry Communications*, 2021, **125**, 108405.
160. N. Kitchamsetti, D. Narsimulu, A. Chinthakuntla, C. S. Chakra and A. L. de Barros, *Inorganic Chemistry Communications*, 2022, **144**, 109946.
161. Y. Li, Y. Xia, K. Liu, K. Ye, Q. Wang, S. Zhang, Y. Huang and H. Liu, *ACS applied materials & interfaces*, 2020, **12**, 25494-25502.
162. Y. He, X. Zhang, Y. Wei, X. Chen, Z. Wang and R. Yu, *Chemical Research in Chinese Universities*, 2020, **36**, 447-452.
163. Y. Wang, X. Liu, L. Guo, L. Shang, S. Ge, G. Song, N. Naik, Q. Shao, J. Lin and Z. Guo, *Journal of Colloid and Interface Science*, 2021, **599**, 566-576.
164. S. Zhao, S. Li, Y. Long, X. Shen, Z. Zhao, Q. Wei, S. Wang, Z. Zhang, X. Zhang and Z. Zhang, *Chemosphere*, 2021, **280**, 130637.
165. Z. Wang, H. Wang, Z. Zeng, G. Zeng, P. Xu, R. Xiao, D. Huang, X. Chen, L. He and C. Zhou, *Applied Catalysis B: Environmental*, 2020, **267**, 118700.
166. B. Fang, Z. Liu, Y. Bao and L. Feng, *Chinese Chemical Letters*, 2020, **31**, 2259-2262.
167. J. Lei, S. Wang and J. Li, *Chemical Engineering Science*, 2020, **220**, 115654.
168. Q. Zhou, K. He, X. Wang, K. H. Lim, P. Liu, W. Wang and Q. Wang, *Applied Catalysis A: General*, 2022, **643**, 118796.
169. X. Zhang, X. Sun, D. Xu, X. Tao, P. Dai, Q. Guo and X. Liu, *Applied Surface Science*, 2019, **469**, 764-769.
170. A. Kumar, K. Vikrant, S. A. Younis and K.-H. Kim, *International Journal of Hydrogen Energy*, 2023.
171. Y. Gao, C. Yang, M. Zhou, C. He, S. Cao, Y. Long, S. Li, Y. Lin, P. Zhu and C. Cheng, *Small*, 2020, **16**, 2005060.
172. R. Lippi, A. M. D'Angelo, C. Li, S. C. Howard, I. C. Madsen, K. Wilson, A. F. Lee, C. J. Sumby, C. J. Doonan and J. Patel, *Catalysis Today*, 2021, **368**, 66-77.
173. A. Wang, J. Ni, W. Wang, D. Liu, Q. Zhu, B. Xue, C.-C. Chang, J. Ma and Y. Zhao, *Applied Catalysis B: Environmental*, 2022, **319**, 121926.
174. R. Zhao, X. Shi, T. Ma, H. Rong, Z. Wang, F. Cui, G. Zhu and C. Wang, *ACS Applied Materials & Interfaces*, 2020, **13**, 755-764.
175. I. A. Senosy, Z.-H. Lu, T. M. Abdelrahman, M.-N. O. Yang, H.-M. Guo, Z.-H. Yang and J.-H. Li, *Environmental Science: Nano*, 2020, **7**, 2087-2101.
176. S. Sun, J. Cao, Z. Xu, Z. Yang, W. Xiong, P. Song, R. Zhong and S. Peng, *Journal of Solid State Chemistry*, 2020, **289**, 121492.
177. S. Ren, X. Duan, F. Ge, M. Zhang and H. Zheng, *Journal of Power Sources*, 2020, **480**, 228866.
178. H. Liu, J. Guan, S. Yang, Y. Yu, R. Shao, Z. Zhang, M. Dou, F. Wang and Q. Xu, *Advanced Materials*, 2020, **32**, 2003649.
179. W. Wu, Z. Zhang, Z. Lei, X. Wang, Y. Tan, N. Cheng and X. Sun, *ACS applied materials & interfaces*, 2020, **12**, 10359-10368.
180. A. K. Ipadeola and K. I. Ozoemena, *RSC advances*, 2020, **10**, 17359-17368.
181. T. Zhang, T. Yang, B. Li, S. Wei and W. Gao, *Applied Surface Science*, 2022, **597**, 153662.
182. H. H. Do, C. C. Nguyen, D. L. T. Nguyen, S. H. Ahn, S. Y. Kim and Q. Van Le, *International Journal of Hydrogen Energy*, 2022, **47**, 41587-41595.

183. M. Xiang, Z. Xu, Q. Wu, Y. Wang and Z. Yan, *Journal of Power Sources*, 2022, **535**, 231461.
184. S. Kumaraguru, R. Nivetha, K. Gopinath, E. Sundaravadivel, B. O. Almutairi, M. H. Almutairi, S. Mahboob, M. Kavipriya, M. Nicoletti and M. Govindarajan, *Journal of Materials Research and Technology*, 2022, **18**, 1732-1745.
185. B. Ren, Q. Yi, F. Yang, Y. Cheng, H. Yu, P. Han, Y. Yang, G. Chen, I. Jeerapan and Z. Li, *Energy & Fuels*, 2022, **36**, 8381-8390.
186. M. Yang, L. Jiao, H. Dong, L. Zhou, C. Teng, D. Yan, T.-N. Ye, X. Chen, Y. Liu and H.-L. Jiang, *Science Bulletin*, 2021, **66**, 257-264.
187. W. Chen, J. Pei, C. T. He, J. Wan, H. Ren, Y. Wang, J. Dong, K. Wu, W. C. Cheong and J. Mao, *Advanced Materials*, 2018, **30**, 1800396.
188. Z. Huang, Z. Yang, M. Z. Hussain, Q. Jia, Y. Zhu and Y. Xia, *Journal of Materials Science & Technology*, 2021, **84**, 76-85.
189. T. Mukhiya, A. Muthurasu, A. P. Tiwari, K. Chhetri, S.-H. Chae, H. Kim, B. Dahal, B. M. Lee and H. Y. Kim, *ACS Applied Materials & Interfaces*, 2021, **13**, 23732-23742.
190. X. Shi, J. Du, Z.-S. Xu, J.-F. Du, X.-P. Liu, J.-S. Chen, C.-j. Mao and B.-K. Jin, *International Journal of Hydrogen Energy*, 2022, **47**, 40895-40904.
191. W. Zhang, Y. Wang, H. Zheng, R. Li, Y. Tang, B. Li, C. Zhu, L. You, M.-R. Gao and Z. Liu, *ACS nano*, 2020, **14**, 1971-1981.
192. K. Huang, S. Guo, R. Wang, S. Lin, N. Hussain, H. Wei, B. Deng, Y. Long, M. Lei and H. Tang, *Chinese Journal of Catalysis*, 2020, **41**, 1754-1760.
193. H. Huang, S. Zhou, C. Yu, H. Huang, J. Zhao, L. Dai and J. Qiu, *Energy & Environmental Science*, 2020, **13**, 545-553.
194. Y. Lin, H. Wan, D. Wu, G. Chen, N. Zhang, X. Liu, J. Li, Y. Cao, G. Qiu and R. Ma, *Journal of the American Chemical Society*, 2020, **142**, 7317-7321.
195. W. Li, S. Xue, S. Watzele, S. Hou, J. Fichtner, A. L. Semrau, L. Zhou, A. Welle, A. S. Bandarenka and R. A. Fischer, *Angewandte Chemie*, 2020, **132**, 5886-5892.
196. Y. Li, Z. Wang, J. Hu, S. Li, Y. Du, X. Han and P. Xu, *Advanced Functional Materials*, 2020, **30**, 1910498.
197. C. C. Hou, L. Zou, Y. Wang and Q. Xu, *Angewandte Chemie International Edition*, 2020, **59**, 21360-21366.
198. Y. Wang, L. Yan, K. Dastafkan, C. Zhao, X. Zhao, Y. Xue, J. Huo, S. Li and Q. Zhai, *Advanced Materials*, 2021, **33**, 2006351.
199. S. L. Zhang, B. Y. Guan, X. F. Lu, S. Xi, Y. Du and X. W. Lou, *Advanced Materials*, 2020, **32**, 2002235.
200. C. Zhang, H. Yang, D. Zhong, Y. Xu, Y. Wang, Q. Yuan, Z. Liang, B. Wang, W. Zhang and H. Zheng, *Journal of Materials Chemistry A*, 2020, **8**, 9536-9544.
201. H. Xu, H. Shang, C. Wang, L. Jin, C. Chen, C. Wang and Y. Du, *Applied Catalysis B: Environmental*, 2020, **265**, 118605.
202. Z. Li, Z. Jiang, W. Zhu, C. He, P. Wang, X. Wang, T. Li and L. Tian, *Applied Surface Science*, 2020, **504**, 144368.
203. J. Zhang, L. Yu, Y. Chen, X. F. Lu, S. Gao and X. W. Lou, *Advanced Materials*, 2020, **32**, 1906432.
204. L. Chai, L. Zhang, X. Wang, L. Xu, C. Han, T.-T. Li, Y. Hu, J. Qian and S. Huang, *Carbon*, 2019, **146**, 248-256.
205. D. Yan, L. Zhang, L. Shen, R. Hu, W. Xiao and X. Yang, *Green Energy & Environment*, 2022.
206. A. Radwan, H. Jin, B. Liu, Z. Chen, Q. Wu, X. Zhao, D. He and S. Mu, *Carbon*, 2021, **171**, 368-375.
207. Y. Arafat, M. R. Azhar, Y. Zhong, X. Xu, M. O. Tadé and Z. Shao, *Nano-Micro Letters*, 2020, **12**, 1-16.
208. Y. Jing, Y. Cheng, L. Wang, Y. Liu, B. Yu and C. Yang, *Chemical Engineering Journal*, 2020, **397**, 125539.

209. Y. Zhou, B. Tang, S. Wang and J. Long, *International Journal of Hydrogen Energy*, 2020, **45**, 15785-15795.
210. A. Hinokimoto, J.-S. M. Lee, H. Izu, L. Chen, M. Tsujimoto and S. Horike, *ACS Applied Energy Materials*, 2020, **3**, 11529-11533.
211. S. Zhang, W. Xia, Q. Yang, Y. V. Kaneti, X. Xu, S. M. Alshehri, T. Ahamad, M. S. A. Hossain, J. Na and J. Tang, *Chemical Engineering Journal*, 2020, **396**, 125154.
212. L. Zheng, S. Yu, X. Lu, W. Fan, B. Chi, Y. Ye, X. Shi, J. Zeng, X. Li and S. Liao, *ACS applied materials & interfaces*, 2020, **12**, 13878-13887.
213. W.-Z. Cheng, J.-L. Liang, H.-B. Yin, Y.-J. Wang, W.-F. Yan and J.-N. Zhang, *Rare Metals*, 2020, **39**, 815-823.
214. R. Anwar, N. Iqbal, S. Hanif, T. Noor, X. Shi, N. Zaman, D. Haider, S. A. M. Rizvi and A. Kannan, *Catalysts*, 2020, **10**, 799.
215. X. Chen, D.-D. Ma, B. Chen, K. Zhang, R. Zou, X.-T. Wu and Q.-L. Zhu, *Applied Catalysis B: Environmental*, 2020, **267**, 118720.
216. M. Yang, Y. Yuan, Y. Li, X. Sun, S. Wang, L. Liang, Y. Ning, J. Li, W. Yin, R. Che and Y. Li, *Carbon*, 2020, **161**, 517-527.
217. Y. Wang, X. Gao, C. Lin, L. Shi, X. Li and G. Wu, *Journal of Alloys and Compounds*, 2019, **785**, 765-773.
218. J. Ouyang, Z. He, Y. Zhang, H. Yang and Q. Zhao, *ACS Applied Materials & Interfaces*, 2019, **11**, 39304-39314.
219. J. Yan, Y. Huang, X. Han, X. Gao and P. Liu, *Composites Part B: Engineering*, 2019, **163**, 67-76.
220. K. Wang, S. Zhang, W. Chu, H. Li, Y. Chen, B. Chen, B. Chen and H. Liu, *Journal of Colloid and Interface Science*, 2021, **591**, 463-473.
221. X. Xu, F. Ran, H. Lai, Z. Cheng, T. Lv, L. Shao and Y. Liu, *ACS applied materials & interfaces*, 2019, **11**, 35999-36009.
222. Y.-L. Wang, S.-H. Yang, H.-Y. Wang, G.-S. Wang, X.-B. Sun and P.-G. Yin, *Carbon*, 2020, **167**, 485-494.
223. Y. Jiao, S. Cheng, F. Wu, X. Pan, A. Xie, X. Zhu and W. Dong, *Composites Part B: Engineering*, 2021, **211**, 108643.
224. X. Xu, F. Ran, Z. Fan, H. Lai, Z. Cheng, T. Lv, L. Shao and Y. Liu, *ACS applied materials & interfaces*, 2019, **11**, 13564-13573.
225. Y. Liu, X. Zhou, Z. Jia, H. Wu and G. Wu, *Advanced Functional Materials*, 2022, **32**, 2204499.
226. T. Hou, Z. Jia, B. Wang, H. Li, X. Liu, Q. Chi and G. Wu, *Chemical Engineering Journal*, 2021, **422**, 130079.
227. X. Li, E. Cui, Z. Xiang, L. Yu, J. Xiong, F. Pan and W. Lu, *Journal of Alloys and Compounds*, 2020, **819**, 152952.
228. J. Chen, J. Zheng, F. Wang, Q. Huang and G. Ji, *Carbon*, 2021, **174**, 509-517.
229. P. Liu, S. Gao, Y. Wang, Y. Huang, W. He, W. Huang and J. Luo, *Chemical Engineering Journal*, 2020, **381**, 122653.
230. L. Huang, C. Chen, X. Huang, S. Ruan and Y.-J. Zeng, *Composites Part B: Engineering*, 2019, **164**, 583-589.
231. D. Xu, Y. Yang, K. Le, G. Wang, A. Ouyang, B. Li, W. Liu, L. Wu, Z. Wang, J. Liu and F. Wang, *Chemical Engineering Journal*, 2021, **417**, 129350.
232. X. Zhang, Z. Jia, F. Zhang, Z. Xia, J. Zou, Z. Gu and G. Wu, *Journal of Colloid and Interface Science*, 2022, **610**, 610-620.
233. J. Qiao, X. Zhang, C. Liu, L. Lyu, Y. Yang, Z. Wang, L. Wu, W. Liu, F. Wang and J. Liu, *Nano-Micro Letters*, 2021, **13**, 1-16.
234. X. Di, Y. Wang, Z. Lu, R. Cheng, L. Yang and X. Wu, *Carbon*, 2021, **179**, 566-578.

235. Y. Zhao, W. Wang, X. Li, H. Lu, Z. Shi, Y. Wang, C. Zhang, J. Hu and G. Shan, *Acs Photonics*, 2020, **7**, 2440-2447.
